## Research Article

**Title: A functional topography within the cholinergic basal forebrain for encoding sensory cues and behavioral reinforcement outcomes.**

**Author names and affiliations:** Blaise Robert<sup>1</sup>, Eyal Y. Kimchi<sup>1,2</sup>, Yurika Watanabe<sup>1</sup>, Tatenda Chakoma<sup>1</sup>, Miao Jing<sup>3</sup>, Yulong Li<sup>4</sup>, and Daniel B. Polley<sup>\*1,5</sup>

1- Eaton-Peabody Laboratories, Massachusetts Eye and Ear Infirmary, Boston MA 02114 USA

2- Dept. Neurology, Massachusetts General Hospital, Boston MA 02114

3- Chinese Institute for Brain Research, Beijing 102206, China.

4- State Key Laboratory of Membrane Biology, Peking University School of Life Sciences; PKU-IDG/McGovern Institute for Brain Research; Peking-Tsinghua Center for Life Sciences, Beijing 100871, China

5- Dept. Otolaryngology - Head and Neck Surgery, Harvard Medical School, Boston MA 02114 USA

\* Corresponding author and Lead Contact

\*Correspondence: [daniel\\_polley@meei.harvard.edu](mailto:daniel_polley@meei.harvard.edu)

1 **Keywords:** acetylcholine; cholinergic; basal forebrain; nucleus basalis; horizontal limb diagonal band;  
2 substantia innominata; reward; punishment; learning; auditory

3

4

5

6

7

8

9

10

11

12

13

14

15

16

17

18

19

20

21

22

23

24  
25  
26  
27  
28  
29  
30  
31  
32  
33  
34  
35  
36  
37  
38  
39  
40  
41  
42  
43  
44  
45  
46  
47  
48  
49  
50  
51  
52  
53  
54  
55  
56  
57  
58  
59  
60  
61  
62  
63  
64  
65  
66

## Abstract

Basal forebrain cholinergic neurons (BFCNs) project throughout the cortex to regulate arousal, stimulus salience, plasticity, and learning. Although often treated as a monolithic structure, the basal forebrain features distinct connectivity along its anteroposterior axis that could impart regional differences in BFCN processing. Here, we performed simultaneous bulk calcium imaging from anterior and posterior BFCNs over a one-month period of variable reinforcement learning in mice. BFCNs in both regions showed equivalently weak responses to unconditioned visual stimuli and anticipated rewards. Anterior BFCNs in the horizontal limb of the diagonal band were more responsive to reward omission, more accurately classified behavioral outcomes, and more closely tracked fluctuations in pupil-indexed global brain state. Posterior BFCNs in globus pallidus and substantia innominata were more responsive to unconditioned auditory stimuli, orofacial movements, aversive reinforcement, and showed robust associative plasticity for punishment-predicting cues. These results identify a functional topography that diversifies cholinergic modulatory signals broadcast to downstream brain regions.

## Introduction

Basal forebrain projections innervate the neocortex, hippocampus, and amygdala to regulate stimulus salience and global brain state across a wide range of timescales (for recent reviews see Disney and Higley, 2020; Monosov, 2020; Sarter and Lustig, 2020). The basal forebrain is not a monolithic structure, but rather a constellation of discrete brain areas that feature distinct combinations of neurochemical cell types and distinct arrangements of afferent and efferent connections (Gielow and Zaborszky, 2017; Li et al., 2018; Rye et al., 1984; Zaborszky et al., 2012). Any single region of the basal forebrain is composed of glutamatergic, GABAergic, and cholinergic neurons, which generally share the same sources of input but can vary widely between cell types both in their downstream targeting and functional response properties (Do et al., 2016; Laszlovszky et al., 2020; Yang et al., 2017). As a whole, the basal forebrain is understood to contribute to learning, memory, attention, arousal, and neurodegenerative disease processes (Everitt and Robbins, 1997; Monosov, 2020; Zaborszky et al., 2012). However, the heterogeneity of cell types and projection targets have made it challenging to identify specific computations or specialized feature processing performed by “the” basal forebrain, underscoring the need for cell type-specific recordings from targeted regions in task-engaged animals.

Basal forebrain cholinergic neurons (BFCNs), though numerically the rarest major neurochemical class of basal forebrain neuron (Gritti et al., 2006), are by far the most extensively studied. In rats and mice, where cholinergic neurons can be accessed for tracing, monitoring, and manipulation with transgenic approaches, BFCNs exhibit distinct arrangements of afferent and efferent connections along the extended rostrocaudal axis (Gielow and Zaborszky, 2017). BFCNs in rostral structures such as the horizontal limb of the diagonal band of Broca (HDB) feature strong reciprocal connectivity with prefrontal cortex and lateral hypothalamus, with additional projections to entorhinal cortex, olfactory bulb, and pyriform cortex (Bloem et al., 2014; Gielow and Zaborszky, 2017; Li et al., 2018; Rye et al.,

67 1984; Zaborszky et al., 2012) (**Figure 1A**). By contrast, BFCNs at the caudal tail of the basal  
68 forebrain, at the intersection of globus pallidus and substantia innominata (GP/SI), receive  
69 strong inputs from the caudate putamen, the medial geniculate and posterior intrathalamic  
70 nuclei, and are the primary source of cholinergic input to the auditory cortex (ACtx), with  
71 comparatively weak projections to frontal cortical areas (Chavez and Zaborszky, 2017; Guo et  
72 al., 2019; Kamke et al., 2005; Rye et al., 1984; Zaborszky et al., 2012).

73  
74 Although rostral and caudal BFCNs are wired into distinct anatomical networks, the suggestion  
75 is that they broadcast a relatively unified signal to downstream brain areas. The evidence for  
76 this conclusion primarily comes from two types of measurements. First, there are many  
77 converging reports of strong, short-latency BFCN responses to aversive stimuli such as air  
78 puffs or foot shock whether recordings are made from HDB 10/14/2021 3:34:00 PM, from the  
79 caudal extreme of the basal forebrain, GP/SI (Guo et al., 2019), or from an intermediate region  
80 of rodent SI often labeled as nucleus basalis (Hangya et al., 2015; Laszlovszky et al., 2020;  
81 Letzkus et al., 2011), Second, cortical fluorescence imaging of genetically encoded  
82 acetylcholine (ACh) sensors or calcium signals in BFCN axons have demonstrated a strong  
83 correspondence between cholinergic activity and behavioral indices of global arousal, as  
84 determined from EEG markers, iso-luminous pupil diameter changes, and gross motor  
85 markers such as grooming or locomotion (ACh sensor imaging - (Lohani et al., 2021; Teles-  
86 Grilo Ruivo et al., 2017); Calcium imaging for HDB - (Harrison et al., 2016; Sturgill et al., 2020),  
87 nucleus basalis - (Reimer et al., 2016), GP/SI - (Nelson and Mooney, 2016)).

88  
89 On the other hand, there are many inconsistencies in the emerging BFCN literature. These  
90 discrepancies could reflect differences in the anatomical source of BFCN activity, or they could  
91 arise from differences in mouse lines, behavioral task designs, and measurement techniques.  
92 For example, auditory cue-evoked BFCN responses have been described as absent altogether  
93 (Hangya et al., 2015), observed only for reward-predictive sounds (Crouse et al., 2020;  
94 Harrison et al., 2016; Kuchibhotla et al., 2017; Parikh et al., 2007), or enhanced after  
95 reinforcement learning but present even for unconditioned stimuli (Guo et al., 2019). Similarly,  
96 behavioral accuracy in discrimination tasks have been classified from BFCN activity both  
97 preceding and following the sensory cue (Kuchibhotla et al., 2017; Parikh et al., 2007), only  
98 from the post-cue response period (Laszlovszky et al., 2020; Sturgill et al., 2020), or only from  
99 putative non-cholinergic cell types (Hangya et al., 2015; Lin and Nicolelis, 2008). Reward-  
100 evoked BFCN activity has been described as weak overall (Crouse et al., 2020; Harrison et al.,  
101 2016; Parikh et al., 2007) or rapid and quite strong, particularly for uncertain rewards (Hangya  
102 et al., 2015; Laszlovszky et al., 2020; Sturgill et al., 2020; Teles-Grilo Ruivo et al., 2017).  
103 Finally, the relationship between BFCN activity and movement is unclear, with variable reports  
104 of strong recruitment by orofacial movements or locomotion occurring outside of a behavioral  
105 task (Harrison et al., 2016; Nelson and Mooney, 2016), strong only for movements associated  
106 with reinforcement (Crouse et al., 2020), or absent, whether movements were linked to  
107 reinforcement or not (Hangya et al., 2015; Parikh et al., 2007). In fact, while mesoscale  
108 imaging from the entire dorsal surface of the mouse neocortex was recently used to confirm an  
109 overall strong association between motor activity, global brain state, and ACh release, the

110 findings also emphasized clear differences between behavioral states and spatiotemporal ACh  
111 dynamics, again suggesting functional heterogeneity in the sources of cholinergic input  
112 innervating anterior and posterior cortical regions (Lohani et al., 2021).

113  
114 To better understand whether the disparate findings described above may reflect regional  
115 specializations for processing sensory and reinforcement signals within the cholinergic basal  
116 forebrain, we developed an approach to minimize inter-subject variation by testing all of the  
117 experimental features mentioned above in individual mice while making simultaneous fiber-  
118 based bulk GCaMP recordings from BFCNs in HDB and GP/SI. For some variables, we  
119 observed closely matched responses in rostral and caudal regions, suggesting a common  
120 output that would be broadcast to downstream brain regions. For example, both HDB and  
121 GP/SI exhibited equivalently weak overall responses to unconditioned visual stimuli and  
122 anticipated rewards. For other measures, we noted clear differences between BFCN activity in  
123 each region: HDB exhibited a comparatively strong association with pupil-indexed brain state,  
124 behavioral trial outcome, and with the omission of expected rewards. Response amplitudes for  
125 aversive stimuli were larger in GP/SI, as were responses to orofacial movements,  
126 unconditioned auditory stimuli, and learning-related enhancement of punishment-predicting  
127 auditory cues. These findings identify a coarse functional topography within the cholinergic  
128 basal forebrain that can be interpreted in light of the distinct connectivity of each region and will  
129 motivate future hypotheses about the causal involvement of each region in brain function and  
130 behavior.

131

132

## Results

133

### **A transgenic strategy for selective GCaMP expression in HDB and GP/SI BFCNs**

134  
135 To characterize regional specializations within the cholinergic basal forebrain across a wide  
136 range of task-related variables, we performed dual fiber imaging from HDB and GP/SI in the  
137 right hemisphere of Chat-Cre mice that were crossed to the GCaMP6f reporter line, Ai148  
138 (**Figure 1B-C**). Using cre-expressing mice for functional characterization of cholinergic  
139 neurons can be challenging. ChAT<sub>(BAC)</sub>-Cre and ChAT<sub>(IRES)</sub>-Cre homozygous mice exhibit  
140 behavioral irregularities that can be avoided by using ChAT<sub>(IRES)</sub>-Cre hemizygous littermates  
141 (Chen et al., 2018). Ectopic expression in glia and non-cholinergic neurons can also be a  
142 problem, even in popular ChAT<sub>(IRES)</sub>-Cre lines, either because the presence of a frt-flanked neo  
143 cassette can result in off-target expression, or because a fraction of glutamatergic neurons  
144 express ChAT transiently during development and would therefore still be labeled with cre-  
145 based transgenic expression approaches (Nasirova et al., 2020).

146

147 Here, we used hemizygous offspring from the ChAT<sub>(IRES)</sub>-Cre $\Delta$ neo line, in which the neo  
148 cassette is removed to reduce ectopic expression (Nasirova et al., 2020). We confirmed that  
149 GCaMP expression was almost entirely restricted to cholinergic neurons within the HDB and  
150 GP/SI by immunolabeling regions near the end of the fiber tips for ChAT in a subset of  
151 implanted mice (N=4, see **Figure 1 - figure supplement 1** for a presentation of all 22 fiber tip  
152 locations in 11 mice). ChAT-negative neurons that expressed GCaMP were rare, amounting to

153 just 95/1719 in HDB (5.5%) and 48/764 in GP/Sl (6.3%) (**Figure 1D, left**). As identified in prior  
154 studies, we observed aberrant expression in brain regions outside of the basal forebrain,  
155 including both the near-complete absence of GCaMP expression in ChAT+ striatal  
156 interneurons (**Figure 1D, right**) but also ectopic expression of GCaMP in ChAT-negative cells  
157 in neocortex and hippocampus. Therefore, while our transgenic strategy was appropriate for  
158 bulk imaging from cholinergic neurons in HDB and GP/Sl cholinergic neurons (and in fact was  
159 aided by the absence of striatal GCaMP expression), it would not necessarily be a valid  
160 strategy for the study of other brain regions.

161

### 162 **Strong coherence between pupil-indexed arousal and cholinergic activity**

163 Basal forebrain neurons have a well-established role in regulating global brain state (Buzsaki  
164 et al., 1988; Kim et al., 2015; Yang et al., 2017). The cholinergic basal forebrain, in particular,  
165 is a key regulator of neocortical excitability across sleep states as well as levels of vigilance  
166 during quiescent awake states (Buzsaki et al., 1988; Everitt and Robbins, 1997; McGinley et  
167 al., 2015b; Reimer et al., 2016; Teles-Grilo Ruivo et al., 2017). Under iso-luminous lighting  
168 conditions, pupil diameter provides a sensitive index of arousal and has been shown to co-vary  
169 with GCaMP activity measured in cholinergic basal forebrain axon fields within the neocortex  
170 (Nelson and Mooney, 2016; Reimer et al., 2016). Prior measurements were either made in  
171 ChAT-Cre x GCaMP reporter lines or via relatively large viral solution injection quantities (0.4 –  
172 1  $\mu$ L), which leaves unresolved the question of how the activity of cholinergic neurons in  
173 specific regions of the basal forebrain corresponds to pupil-indexed arousal state. To address  
174 this point, we simultaneously monitored spontaneous pupil fluctuations alongside fiber-based  
175 GCaMP imaging from HDB and GP/Sl. We observed a striking correspondence between  
176 spontaneous pupil dilations and slow fluctuations in GCaMP signal amplitudes in both regions  
177 of the cholinergic basal forebrain (**Figure 1E**). GCaMP coherence with pupil fluctuations was  
178 significantly higher in HDB than GP/Sl, where bulk calcium dynamics could account for as  
179 much as 80% of the variability in slow pupil changes (**Figure 1F**, statistical reporting provided  
180 in figure legends). The timing of correlated GCaMP transients and pupil dilations were similar  
181 across brain areas, where GCaMP signals led pupil dilations by approximately 0.7s (**Figure**  
182 **1G**).

183

184 One of the underlying assumptions in our approach is that bulk calcium imaging from ChAT-  
185 Cre neurons in the basal forebrain is a useful way to measure the suprathreshold activity of  
186 local BFCNs and infer the timing of ACh release in downstream targets. For example, based  
187 on the correspondence between basal forebrain bulk GCaMP levels and pupil diameter, it  
188 would be reasonable to hypothesize that ACh levels also co-vary with pupil dilations with a  
189 similar coherence. HDB and GP/Sl BFCNs both project to ACtx, although BFCN  $\rightarrow$  ACtx  
190 projections are far more numerous in GP/Sl than HDB (Chavez and Zaborszky, 2017; Guo et  
191 al., 2019; Kamke et al., 2005; Rye et al., 1984). To monitor ACh dynamics in ACtx related to  
192 pupil fluctuations, we expressed the genetically encoded ACh fluorescent sensor, GRAB<sub>ACh</sub>3.0  
193 (ACh3.0), in ACtx neurons and monitored fluorescence dynamics with tapered optical fibers  
194 (**Figure 1H**) (Jing et al., 2020; Pisano et al., 2019). As expected, coherence between ACtx  
195 ACh3.0 fluorescence and pupil fluctuations strongly resembled GCaMP coherence from GP/Sl

196 cell bodies, both in terms of the strong coherence with slow (< 0.1 Hz) changes in pupil  
197 diameter (**Figure 1I**) and in terms of timing, where ACh3.0 signal surges led pupil dilations by  
198 approximately 0.6s (**Figure 1J**). These findings validate our use of bulk fiber-based calcium  
199 imaging in the GCaMP reporter line as a useful way to monitor cholinergic basal forebrain  
200 activity and additionally demonstrate a strong correspondence between pupil-indexed arousal  
201 and activity surges in HDB and – to a lesser extent – GP/Sl.

202

### 203 **Audiovisual stimulus encoding and habituation across the cholinergic basal forebrain**

204 Having confirmed that our dual fiber bulk GCaMP imaging approach could capture the  
205 expected relationship between pupil-indexed brain state and cortical ACh levels, we next  
206 tested regional variations in BFCN responses for passively presented unconditioned auditory  
207 and visual stimuli that had no explicit behavioral significance (**Figure 2A**). As illustrated in an  
208 example mouse, presentation of novel – but behaviorally irrelevant – drifting visual gratings  
209 elicited weak responses from both regions. Auditory spectrotemporal gratings (i.e., ripples)  
210 elicited comparable responses in HDB but robust responses in GP/Sl even at the lowest sound  
211 levels tested (**Figure 2B**). Quantification of visual- and sound-evoked responses across all  
212 mice (N=11) confirmed modest bulk BFCN responses to visual gratings of varying contrast that  
213 did not differ significantly between HDB and GP/Sl (**Figure 2C, top**). BFCN responses to  
214 unconditioned auditory stimuli were markedly different than visual stimuli, as observed both for  
215 complex broadband ripple sounds (**Figure 2C, middle**) and brief pure tone pips (**Figure 2C,**  
216 **bottom**). In GP/Sl, significant BFCN responses were observed for both types of sounds at all  
217 stimulus intensities and were all significantly greater than the corresponding HDB responses.

218

219 To better understand how modest HDB and robust GP/Sl responses to broadband auditory  
220 ripples related to stimulus novelty and stimulus-elicited arousal, we returned to an analysis of  
221 pupil dilations, which can be elicited by sounds that are novel, emotionally evocative, or require  
222 heightened listening effort (Becket Ebitz and Moore, 2019; McGinley et al., 2015b; Zekveld et  
223 al., 2018). Along these lines, we observed large pupil dilations to the first presentation of an  
224 auditory ripple at 70 dB SPL, which then habituated to approximately 50% of their initial  
225 amplitude after one or two trials, presumably reflecting the loss of stimulus novelty (**Figure**  
226 **2D**). Ripple-evoked BFCN responses decayed in parallel with pupil responses, where  
227 responses decreased by approximately 30% after the first presentation before stabilizing at  
228 approximately 60% of the initial amplitude across subsequent presentations. Although the  
229 ripple-evoked response amplitude was greater overall in GP/Sl than HDB, the proportional  
230 decay with habituation was equivalent (**Figure 2E**). Rapid habituation of BFCN responses  
231 were also observed for auditory ripples presented at lower sound levels, visual gratings at  
232 lower contrast, and for moderate intensity pure tones, providing further evidence that BFCN  
233 sensory responses were modulated stimulus novelty across a wide range of physical stimulus  
234 types (**Figure 2 – figure supplement 2**). Finally, to control for the possibility that the  
235 progressive response decay reflected photobleaching of the sample or another source of  
236 measurement noise, we also quantified the amplitude of spontaneous GCaMP transients  
237 measured during trials in which neither auditory nor visual stimuli were presented. We found  
238 that the amplitude of spontaneous GCaMP transients was unchanged throughout the recording

239 period, confirming that the reduced sensory-evoked GCaMP responses over the test session  
240 reflected habituation to stimulus novelty (**Figure 2F**).

241

### 242 **Stable BFCN responses to reward-predicting cues**

243 Prior studies have described enhanced BFCN responses to sensory cues associated with  
244 reward (Crouse et al., 2020; Harrison et al., 2016; Kuchibhotla et al., 2017; Parikh et al., 2007)  
245 and co-modulation of BFCN activity rates with behavioral performance accuracy in sensory  
246 detection and recognition tasks (Kuchibhotla et al., 2017; Laszlovszky et al., 2020; Parikh et  
247 al., 2007; Sturgill et al., 2020). To determine how BFCN activity dynamics related to appetitive  
248 learning and task performance, we conditioned mice to lick a delivery spout shortly following  
249 the onset of a tone to receive a sugar water reward (**Figure 3A**). To temporally separate the  
250 cue, operant motor response, and reinforcement timing, the reward was delayed until mice  
251 produced an extended, vigorous bout of licking ( $\geq 7$  licks in 2.8s). Although the rates of  
252 procedural learning varied somewhat between mice (**Figure 3B**), all mice learned the task  
253 within a few sessions and either detected the tone to receive reward (hit) or failed to lick at all  
254 in response to the tone (miss), with very few instances of partial hits ( $>0$  but  $< 7$  licks in 2.8s)  
255 observed after the first few behavioral sessions (**Figure 3C**).

256

257 We contrasted BFCN activity on hit and miss trials over the course of operant testing in HDB  
258 (**Figure 3D**) and GP/SI (**Figure 3E**). On average, tone-evoked responses were not greatly  
259 changed late in training, after mice had learned the stimulus-reward association (**Figure 3F-G**).  
260 Responses were slightly elevated at longer latencies after stimulus onset early in training,  
261 though this difference could be explained by differences in lick rate duration over the course of  
262 training (**Figure 3 – figure supplement 1**). Overall, BFCN responses to reward-predicting  
263 tones did not significantly change over the course of learning for hit or miss trials in either brain  
264 area (**Figure 3H**). This result stands in contrast to prior reports of enhanced responses for  
265 sounds with a learned reward association, though it should be noted none of these prior  
266 studies had targeted BFCNs in HDB or GP/SI (Crouse et al., 2020; Harrison et al., 2016;  
267 Kuchibhotla et al., 2017; Parikh et al., 2007). Another possibility is that response enhancement  
268 to reward-predicting sounds had already occurred during the initial shaping period that  
269 preceded the first operant imaging session, thereby escaping our analysis. Although  
270 performance in the Go-NoGo auditory task clearly improved over the course of our imaging  
271 period (Figure 3B-C), learning related enhancements of cue-evoked BFCN responses can  
272 occur within just a few behavioral sessions (Crouse et al., 2020; Sturgill et al., 2020), so we  
273 cannot rule out this possibility.

274

### 275 **BFCN activity preceding and following cue onset predicts behavioral trial outcome**

276 Although cue-evoked response amplitudes were not obviously changed over the course of  
277 rewarded learning, they clearly differed between hit and miss trials. Cue-evoked responses  
278 were strongly reduced in HDB and GP/SI on miss trials (**Figure 3D-H**), although this difference  
279 is confounded by the potential contribution of lick-related motor activity that would only occur  
280 on hit trials. For this reason, differences in the pre-cue baseline activity levels are particularly  
281 illuminating, as they can reveal associations between population BFCN activity and behavioral

282 performance without the influence of task-related sensory inputs or movements. We found that  
283 mean BFCN activity measured in a 1s period prior to cue onset was significantly elevated on  
284 miss trials in both structures, though the difference was significantly greater in HDB (**Figure**  
285 **3I**).

286  
287 To determine whether these differences were sufficient to classify single trial outcomes, we  
288 trained a decoder on bulk BFCN activity measured in the HDB fiber, the GP/SI fiber, or from  
289 the simultaneous activity from both fibers. This was accomplished by first reducing the  
290 dimensionality of the data matrix with principal components analysis and then training a binary  
291 support vector machine on the principal components projection to classify whether the pre-cue  
292 (**Figure 4A**) or post-cue (**Figure 4C**) BFCN activity from a single trial culminated in a hit or  
293 miss outcome. Despite the limited spatial and temporal resolution of GCaMP fiber imaging,  
294 differences in both pre- and post-cue BFCN activity supported classification of behavioral trial  
295 outcome with an accuracy that was significantly greater than a randomized control assignment  
296 for all brain structures (**Figure 4B** and **4D**). For either pre- and post-cue activity, the HDB fiber  
297 classification accuracy was significantly higher than GP/SI and was not significantly different  
298 than the combined activity from both fibers.

### 300 **Movement-related activity in the cholinergic basal forebrain**

301 The results presented thus far identify clear functional differences between rostral and caudal  
302 BFCNs. We have shown that rostral HDB activity is more closely related to global brain state  
303 and behavioral accuracy, whereas the caudal GP/SI exhibited more robust responses to  
304 auditory stimuli, regardless of their novelty or behavioral relevance. As a next step, we  
305 investigated differential recruitment of each region by motor activity by analyzing BFCN activity  
306 surrounding licking events during the inter-trial interval.

307  
308 Licking behavior during the inter-trial period ranged from spurious checks of the lickspout,  
309 composed of just one or two successive licks, all the way to the occasional presentation of the  
310 operant lick bout behavior (i.e., a false alarm). As illustrated in an example mouse, we noted a  
311 modest increase in BFCN activity beginning shortly after the onset of an intense lick bout in  
312 GP/SI and, to a lesser extent, HDB (**Figure 5A, left column**). We also observed an  
313 unexpected second increase in BFCN activity following the offset of the lick bout (**Figure 5A,**  
314 **right column**). BFCN responses to the onset of licks increased monotonically across lick bout  
315 duration and, while fairly modest overall (i.e., when compared to cue-evoked responses), were  
316 significantly greater in GP/SI than HDB (**Figure 5B**). False alarm events during the inter-trial  
317 interval were uncommon overall, mostly occurring mid-way through the operant learning task  
318 (**Figure 5 – figure supplement 1A**). Unlike the elevated BFCN activity prior to cue onset in  
319 undetected miss trials (Figure 3I), we did not observe a commensurate elevation in BFCN  
320 activity prior to false alarm events, suggesting that changes in baseline activity levels are more  
321 closely related to perceptual accuracy than behavioral action (**Figure 5 – figure supplement**  
322 **1B**).

323



324 We also noted phasic responses at the cessation of licking, but only when lick bouts exceeded  
325 the threshold for a false alarm event (**Figure 5C**). In GP/SI, we noted only a minimal response  
326 to the offset of  $\geq 7$  licks, which was not significantly greater than the response to shorter lick  
327 bouts. In HDB, which exhibited comparatively weak responses to movement onset, we  
328 observed significantly greater responses at the offset of lick bouts, but only when  $\geq 7$  licks were  
329 produced (**Figure 5D-E**). One interpretation of these findings is that the mouse occasionally  
330 deployed the full operant lick behavior during the silent inter-trial interval in anticipation of  
331 reward. In this scenario, phasic responses at the offset of false alarm events may reflect a  
332 reward omission response. Both cases – the increasing GP/SI activity with lick number and  
333 selective HDB responses after the omission of an anticipated reward - corroborate recent  
334 findings that BFCNs are more strongly recruited by motor actions that are expected to result in  
335 reward (Crouse et al., 2020), a possibility that we address more directly in the next stage of  
336 behavioral experiments.

### 337 338 **BFCN responses to punishment, reward, and reward omission**

339 To address how behavioral reinforcement – and the omission of anticipated reinforcement –  
340 was related to activity in different regions of the BFCN, mice were advanced to the next phase  
341 of the operant training procedure, in which one of the tone frequencies maintained its  
342 association with reward, while the other two frequencies were either switched to reward  
343 omission or punishment (**Figure 6A**). Operant “Go” responses ( $\geq 7$  licks in 2.8s) were initially  
344 high to all tone frequencies following the abrupt change in reinforcement outcome (**Figure 6B**).  
345 Within a few behavioral sessions, Go responses to the tone associated with a neutral outcome  
346 were reduced to approximately 40% of trials and Go response to the tone associated with  
347 tongue shock was only observed on approximately 25% of trials (**Figure 6C**).

348  
349 This arrangement allowed us to contrast BFCN responses in HDB and GP/SI elicited by  
350 reward delivery, reward omission, and punishment (**Figure 6D**). We observed that BFCN  
351 responses to anticipated rewards were very weak in both HDB and GP/SI (**Figure 6E**). The  
352 omission of an anticipated reward was associated with a moderate response in HDB that was  
353 significantly greater than both reward delivery response from the same fiber and the reward  
354 omission response in GP/SI. Delivery of silent, noxious stimulus elicited the strongest BFCN  
355 responses in both regions, although the response to shock was significantly greater in GP/SI  
356 than HDB (Figure 6E). BFCN response latencies to reward omission were significantly slower  
357 than other reinforcement types (mean  $\pm$  SEM for omission vs. reward and shock;  $1.04 \pm 0.03$   
358 vs.  $0.63 \pm 0.03$  seconds, for HDB and GP/SI, respectively; **Figure 6F**). The timing of the  
359 reward omission response was more precisely locked to lick bout offset than to timing of when  
360 reward would have been delivered. However, the response is not likely due to movement per  
361 se, because activity levels following lick bout cessation were significantly greater on reward  
362 omission trials than on trials when the reward was delivered and consumed (**Figure 6 – figure**  
363 **supplement 1**). Recordings from unidentified basal forebrain neuron types in primates  
364 demonstrate that reward-omission responses occur only in a sub-type of neurons with slower,  
365 ramping responses (Zhang et al., 2019). Our observation of slower developing omission

366 responses supports prior descriptions of reward timing and reinforcement prediction error  
367 encoding in BFCNs (Chubykin et al., 2013; Sturgill et al., 2020).

368

### 369 **Learning-related enhancement of BFCN responses to punishment-predicting cues**

370 Our earlier work used a Pavlovian trace conditioning paradigm to identify a transient, selective  
371 enhancement of GP/SI BFCN activity to sounds associated with delayed aversive  
372 reinforcement. Enhanced BFCN single unit spiking emerged within minutes of pairing sound  
373 with aversive air puffs, while a slower, persistent enhancement of cue-evoked fiber-based  
374 GCaMP responses emerged one day after the initial pairing of sounds with foot shock to “fill in”  
375 the silent gap separating the auditory cue and the delayed aversive reinforcement (Guo et al.,  
376 2019). Here, we did not observe enhancement of BFCN responses to reward-predictive cues  
377 (Figure 3H). To reconcile these findings with our prior study, we next examined whether  
378 auditory cues predicting aversive stimuli were enhanced after a reversal in reinforcement  
379 outcome.

380

381 When compared with the Phase 1 all-rewarded stage of the operant task, cue-evoked  
382 responses in HDB remained relatively constant over the remainder of conditioning, showing no  
383 significant differences between reward-related, omission-related, or punishment-related cues  
384 (**Figure 7A**). In GP/SI, responses to the tone frequencies associated with reward and reward  
385 omission were also relatively stable, but cue-evoked responses for the punishment-predicting  
386 tone frequency were enhanced within a few testing sessions following the change in  
387 reinforcement outcome (**Figure 7B**). These data confirm that sound-evoked responses are not  
388 changed for tone frequencies associated with anticipated reward or the unanticipated omission  
389 of reward (**Figure 7C, left and middle**). By contrast, cue-evoked responses increased by  
390 approximately 150% in GP/SI as the animal learned a new association between sound and  
391 punishment (**Figure 7C, right**).

392

393 As a final analysis that plays to the strength of the long-term fiber imaging approach, we  
394 concatenated the tone-evoked HDB and GP/SI responses across hundreds of trials – from the  
395 initial presentation day to the final operant behavioral session (639 presentations of a given  
396 tone frequency, on average; **Figure 7D**). When first exposed to pure tone stimuli on the initial  
397 passive characterization day, GP/SI BFCNs exhibited significantly greater within-session  
398 response habituation than HDB (**Figure 7E**, see also Figure 2 – figure supplement 2C).  
399 Response habituation was reduced as mice became more familiar with the stimuli and task  
400 demands, such that tones associated with reward or reward omission showed stable levels of  
401 reduced habituation throughout Phases 1 and 2 of the operant task (**Figure 7F**). Interestingly,  
402 strong within-session habituation was rekindled later in training, though only in GP/SI and only  
403 for the tone frequency that was remapped to punishment (**Figure 7G**). Taken as a whole,  
404 these findings suggest that strong, rapidly habituating responses in the caudal BFCN may  
405 reflect the neural evaluation of potentially threatening stimuli.

406

407

408

409

## Discussion

410 Progress towards understanding basal forebrain contributions to brain function and behavior  
411 has benefited from approaches that support recordings from genetically identified cholinergic  
412 and GABAergic cell types in behaving animals (Yang et al., 2017). Even when experiments are  
413 largely performed on a single species (mice) and focus largely on a single neurochemical cell  
414 type (cholinergic neurons), there have still been inconsistencies in the conclusions drawn from  
415 different experiments, particularly with respect to how BFCN activity relates to movement, to  
416 reward, to conditioned versus unconditioned sensory cues, and to predicting behavioral  
417 outcomes from cue-related activity. We reasoned that this variability could reflect differences in  
418 measurement technique, inter-subject variation, and differences in where the recordings were  
419 made along the extent of the rostrocaudal basal forebrain. To address this possibility, we  
420 developed an approach to study all of the experimental features listed above in each of our  
421 subjects while making simultaneous recordings from rostral and caudal regions of the  
422 cholinergic basal forebrain that are known to have distinct afferent and efferent connections.

423

424 The findings reported here can be summarized by identifying experimental features where  
425 HDB was more strongly involved than GP/Sl, where GP/Sl was more strongly involved than  
426 HDB, and where both structures were equivalently responsive (**Figure 8**). HDB, perhaps on  
427 account of its strong reciprocal connectivity with the prefrontal cortex, showed a stronger  
428 involvement than GP/Sl on variations of pupil-indexed internal brain state, in predicting  
429 whether the perceptual outcome in a behavioral detection task was a hit or a miss, and in  
430 encoding the omission of anticipated rewards (Gielow and Zaborszky, 2017; Rye et al., 1984;  
431 Zaborszky et al., 2012). Conversely, GP/Sl, perhaps on account of stronger relative inputs  
432 from the striatum and thalamic regions encoding nociceptive inputs and auditory stimuli,  
433 showed a stronger functional selectivity for auditory stimuli, self-initiated movements,  
434 punishment, and learning-related plasticity of auditory cues associated with punishment  
435 (Chavez and Zaborszky, 2017; Rye et al., 1984; Zaborszky et al., 2012).

436

### Specialized processing in the caudal tail of the cholinergic basal forebrain

437  
438 Among these statistically significant regional differences, many were differences of degree, but  
439 a few were more akin to differences of kind. In particular, “native” BFCN responses to  
440 unconditioned auditory stimuli were markedly stronger in GP/Sl compared with HDB, as was  
441 learning-related enhancement of punishment-predicting auditory cues. Other reports of BFCNs  
442 have either observed that cue-evoked responses only emerge after a learned association with  
443 reward (Crouse et al., 2020; Kuchibhotla et al., 2017; Parikh et al., 2007; Sturgill et al., 2020)  
444 or were not obviously present either for reward- or punishment-predicting cues (Hangya et al.,  
445 2015). Although anterior BFCNs receive sparse monosynaptic thalamic inputs from the medial  
446 subdivision of the medial geniculate body and neighboring posterior intralaminar nucleus  
447 (Gielow and Zaborszky, 2017), the input from auditory thalamic regions to GP/Sl appears far  
448 more dense (Chavez and Zaborszky, 2017). Single unit recordings from GP/Sl have revealed  
449 well-tuned short-latency (~10ms) spiking responses to a broad class of sounds including  
450 moderate intensity tones and noise bursts (Chernyshev and Weinberger, 1998; Guo et al.,  
451 2019; Maho et al., 1995). By contrast, single unit recordings from basal forebrain units in the

452 medial septum (rostral to HDB) also identified short latency responses to unconditioned  
453 sounds. However, medial septal units only responded to intense broadband sounds and were  
454 derived from pontine central gray afferent inputs, not auditory thalamic regions (Zhang et al.,  
455 2017).

456  
457 Given that GP/Sl is the predominant source of BFCN input to lateral neocortical regions  
458 including ACtx, one clear implication that would be important to test in future studies is that  
459 auditory stimuli – even sounds with no behavioral relevance – should elicit ACh release in  
460 ACtx. ACh acts through local ACtx microcircuits to remove the fetters that normally limit long-  
461 term associative plasticity, thereby enabling local synaptic processes that support auditory fear  
462 memory encoding (Letzkus et al., 2015; Weinberger, 2004) and perceptual learning (Froemke  
463 et al., 2013; Takesian et al., 2018). Importantly, learning-related plasticity in ACtx requires  
464 transient neuromodulatory surges and does not occur when stimuli are presented in a passive  
465 context (Froemke, 2015). This suggests cholinergic regulation of cortical plasticity is not an all-  
466 or-none gating process but instead may reflect a threshold that is only exceeded when sound-  
467 evoked cholinergic inputs are themselves transiently amplified through learning (Figure 7C and  
468 7G, (Guo et al., 2019). Beyond simple gating mechanisms, dual recordings from single BFCNs  
469 and ACtx neurons during Pavlovian auditory learning (Guo et al., 2019) and attentionally  
470 demanding auditory tasks (Laszlovszky et al., 2020) have demonstrated dynamics in BFCN-  
471 cortex synchrony that change in lockstep with associative plasticity and auditory perceptual  
472 salience. Although the upstream factors that regulate BFCN plasticity and inter-regional  
473 synchrony have yet to be identified, it is clear that models portraying phasic cortical ACh  
474 release occurring only at times of reward, punishment, or heightened arousal need to be  
475 reevaluated, at least as they relate to the caudal tail of the basal forebrain and the ACtx.

476  
477 As for the learning-related enhancement of punishment-predicting - but not reward-predicting  
478 cues in GP/Sl - this again may reflect the unique input this region of the basal forebrain  
479 receives from the medial geniculate and intralaminar thalamic groups, which also exhibit rapid,  
480 selective, and long-lasting enhanced spiking to tones associated with aversive stimuli (Edeline  
481 and Weinberger, 1992; Weinberger, 2011). Learned enhancement of reward-predicting  
482 auditory cues have either been observed in BFCN axons arising from more rostral basal  
483 forebrain regions that innervate the basolateral amygdala (Crouse et al., 2020) and auditory  
484 cortex (Kuchibhotla et al., 2017), or have only been described in putative non-cholinergic  
485 neurons in HDB (Lin and Nicolelis, 2008), which therefore offers no point of contradiction with  
486 the absence of reward-related enhancement reported here in HDB and GP/Sl BFCNs. As  
487 mentioned above, another possibility is that HDB and GP/Sl BFCNs did exhibit an increased  
488 response to reward-predicting cues during the initial association of sound and reward, which  
489 occurred during the behavioral shaping period when we did not monitor activity. Collectively,  
490 these findings point towards the caudal tail of the basal forebrain, which provides the strongest  
491 overall projection from the basal forebrain to ACtx and where approximately 80% of the  
492 neurons are cholinergic (Guo et al., 2019; Kamke et al., 2005; Rye et al., 1984), as a hub for  
493 encoding and associating sound with aversive, noxious stimuli, and for regulating inhibitory

494 microcircuits within ACtx for long-term plasticity to enhance the representation of threat-  
495 predicting sounds (David et al., 2012; Guo et al., 2019; Letzkus et al., 2011).

496

497 Collectively, our findings support the view that rostral and caudal BFCN responses share many  
498 similarities in their response features, particularly as they relate to arousal and reinforcement,  
499 yet regional afferent and efferent connectivity differences – particularly in the caudal tail of the  
500 basal forebrain – support regional specializations for encoding sensory salience and  
501 expressing associative plasticity during aversive reinforcement learning. Interestingly, a  
502 neighboring region to GP/SI in the tail of the striatum also receive specialized dopaminergic  
503 inputs that do not encode reward value, but rather are activated by potentially threatening  
504 sensory stimuli (Menegas et al., 2018). This raises the interesting suggestion that cholinergic  
505 and dopaminergic signaling in the caudal tail of the rodent basal ganglia and basal forebrain  
506 may function as a hub for encoding threatening signals and selecting adaptive threat  
507 avoidance behaviors (Watabe-Uchida and Uchida, 2018).

508

### 509 **Technical considerations in the interpretation of these findings**

510 From a technical perspective, fiber-based imaging was the best methodology to address our  
511 experimental aims, particularly for the goal of performing simultaneous measurements of  
512 rostral and caudal BFCNs over an extended period. BFCNs in GP/SI are arrayed in a thin  
513 dorsoventral sheet along the lateral wall of the internal capsule and then split into thin vertically  
514 oriented arrangements along the medial and lateral boundaries of the external GP (Clayton et  
515 al., 2020; Guo et al., 2019). This anatomy is not optimal for endoscopic imaging through  
516 implanted lenses, as it could be challenging to visualize BFCNs in a single focal plane. Two-  
517 photon imaging of the cortical axon terminals from GP/SI BFCNs is feasible (Nelson and  
518 Mooney, 2016), though these signals would still arise from an indeterminate number of  
519 neurons and concerns about tissue bleaching and photodamage would not be compatible with  
520 the hours of daily testing over 30+ consecutive days that was performed here. Antidromic or  
521 somatic optogenetic tagging of single BFCNs is the gold standard, affording the highest level  
522 of spatial and temporal resolution. Our prior work used the antidromic variant of this approach  
523 to make targeted single unit recordings from GP/SI BFCNs that project to ACtx, but the yield  
524 was punishingly low (~1% of all units recorded) and units could not be held long enough to  
525 measure responses to all of the experimental variables tested here (Guo et al., 2019).

526

527 However, there are important limitations and technical caveats with fiber-based bulk GCaMP  
528 imaging that should be taken into consideration in the interpretation of these findings. Because  
529 fiber photometry signals arise from populations of neurons, it is impossible to discern whether  
530 differences in response amplitude over learning or across different behavioral states reflect the  
531 activation of privileged ensembles that were hitherto silent or instead an increased response  
532 expressed uniformly across neurons. Conversely, the absence of differences in the population  
533 signal could belie striking shifts in the representational dominance of antagonistically related  
534 cellular ensembles that would not be captured by changes in net signal amplitude (Grewe et  
535 al., 2017; Gründemann, 2021; Taylor et al., 2021). Another caveat in the interpretation of fiber-  
536 based GCaMP imaging is that the slow temporal kinetics and poor spatial resolution combines

537 somatic and neuropil-based calcium signals and obscures the relationship to spike rates in  
538 distinct types of BFCNs. This would be particularly worrisome if the axons of BFCNs in HDB or  
539 GP/SI projected to or through the other region, as this could either produce optical cross-talk  
540 (i.e., axon fluorescence originating from BFCNs in region A measured on the region B fiber) or  
541 functional cross-talk (i.e., projections from BFCNs in region A modulate the activity of region  
542 B). Neither of these possibilities is likely a concern in the interpretation of these findings.  
543 Correlating all single trial tone-evoked response amplitudes measured on each fiber reveals a  
544 very weak association ( $R^2 = 0.16$ ,  $n = 21,099$  trials), demonstrating that the activity in HDB and  
545 GP/SI can be measured independently. Further, anatomical characterizations suggest that  
546 BFCN inputs within the basal forebrain primarily arise from local neurons rather than remote  
547 regions (Gielow and Zaborszky, 2017). To this point, direct visualization of efferent HDB axons  
548 showed that they left the basal forebrain in a medial and dorsal orientation, coming nowhere  
549 near the GP/SI fiber (Bloem et al., 2014).

550

### 551 **Cholinergic regulation of perceptual salience**

552 Although the proportion of cholinergic neurons declines rostral to GP/SI, the overall spatial  
553 arrangement and larger cell body size of BFCNs in nucleus basalis and HDB makes somatic  
554 optogenetic tagging of single units somewhat more feasible (Hangya et al., 2015; Laszlovszky  
555 et al., 2020). An elegant recent study has demonstrated that BFCNs within nucleus basalis and  
556 HDB are not an indivisible class, but can themselves be further sub-divided into bursting and  
557 regular-firing BFCNs, where the proportion of each type varied across the rostral-caudal extent  
558 of the basal forebrain and had distinct patterns of synchronization both with respect to each  
559 other and with network oscillations measured in ACtx (Laszlovszky et al., 2020). Interestingly,  
560 when studied in the context of an auditory task similar to the paradigm used here, the spike  
561 timing of bursting BFCNs showed a stronger coupling with the ACtx on trials where mice made  
562 a Go response (regardless of whether it was a hit or false positive) whereas the regular-firing  
563 BFCNs showed a stronger coupling with the ACtx on trials where mice made the correct  
564 response (regardless of whether it was Go or NoGo).

565

566 Although fiber-based BFCN imaging cannot distinguish between the involvement of each cell  
567 type, we also noted a striking correspondence between GCaMP activity in the peri-cue period  
568 and the subsequent behavioral outcome (either hit or miss, Figure 3H-I). Our findings confirm  
569 an association between BFCN activity and trial outcome in the period following the delivery of  
570 the auditory cue (Laszlovszky et al., 2020), but we observed a clear connection to trial  
571 outcome during the preceding 1s baseline period (thereby obviating any confound related to  
572 differences in licking activity between hit and miss trials). Prior studies have also reported that  
573 cholinergic levels prior to auditory onset can predict whether the animal would subsequently  
574 produce the correct or incorrect operant response, suggesting the bulk measures may be  
575 sensitive to pre-cue dynamics that are not resolvable at the level of single neurons  
576 (Kuchibhotla et al., 2017; Parikh et al., 2007). In a recent study, we found that hit or miss trial  
577 outcomes in a challenging auditory detection task could be predicted from the degree of  
578 synchrony in local networks of ACtx layer 2/3 pyramidal neurons measured from a 1s period  
579 prior to the delivery of the auditory cue (Resnik and Polley, 2021). As the cholinergic basal

580 forebrain has classically been studied as a master regulator of cortical network synchrony  
 581 (Buzsaki et al., 1988; Metherate et al., 1992), one clear suggestion is that ongoing cholinergic  
 582 dynamics in the period preceding environmental sensory cues strongly regulate cortical  
 583 network state, which can have profound impacts on the accurate encoding of sensory cues  
 584 and appropriate selection of cue-directed actions.

585  
 586  
 587

## Materials and Methods

| Key Resources Table                    |                                                            |                      |                                    |                        |
|----------------------------------------|------------------------------------------------------------|----------------------|------------------------------------|------------------------|
| Reagent type (species) or resource     | Designation                                                | Source or reference  | Identifiers                        | Additional information |
| Genetic reagent ( <i>M. musculus</i> ) | B6.129S- <i>Chat</i> <sup>tm1(Cre)Low</sup> /MwarJ         | Jackson Laboratory   | RRID:IMSR_J AX:031661              | Male                   |
| Genetic reagent ( <i>M. musculus</i> ) | B6.Cg-Igs7 <sup>tm148.1(tetO-GCaMP6f,CAG-tTA2)Hze</sup> /J | Jackson Laboratory   | RRID:IMSR_J AX:030328              | Female                 |
| Antibody                               | Anti-ChAT (goat polyclonal)                                | Millipore Sigma      | Cat #: AB144P<br>RRID: AB_2079751  | (1:100)                |
| Antibody                               | Anti-Goat (donkey polyclonal)                              | Abcam                | Cat#: AB150132<br>RRID: AB_2810222 | (1:500)                |
| Recombinant DNA reagent                | ACh sensor                                                 | Dr. Yulong Li        | GRAB <sub>ACh</sub> 3.0            |                        |
| Software, algorithm                    | Labview                                                    | National Instruments | RRID: SCR_014325                   | Version 2015           |

|                     |                   |                    |                                     |                |
|---------------------|-------------------|--------------------|-------------------------------------|----------------|
| Software, algorithm | MATLAB            | Mathworks          | RRID: SCR_001622                    | Version R2021a |
| Other               | DAPI stain        | Vectorlabs         | Cat #: H-1500-10<br>RRID:AB_2336788 |                |
| Other               | Allen Brain Atlas | Lein et al. (2007) | RRID:SCR_013286                     |                |

588

## 589 **Animals**

590 All procedures were approved by the Massachusetts Eye and Ear Animal Care and Use  
591 Committee and followed the guidelines established by the National Institutes of Health for the  
592 care and use of laboratory animals. Male ChAT-cre- $\Delta$ Neo (homozygous, Jackson Labs  
593 031661) and female Ai148 mice (hemizygous, Jackson Labs 030328) were bred in house to  
594 generate mice of both sexes for this study. Offspring were therefore hemizygous for ChAT-cre-  
595  $\Delta$ Neo and either had hemizygous expression of cre-dependent GCaMP6f (ChAT+/GCaMP+)  
596 or did not express GCaMP (ChAT+/GCaMP-). Offspring genotypes were confirmed by PCR  
597 (Transnetyx probes) and by histology following perfusion.

598 Experiments were performed in adult mice, 2-3 months of age at the time the first  
599 measurement was performed. Prior to behavioral testing, mice were maintained on a 12 hr  
600 light/12 hr dark cycle with ad libitum access to food and water. Mice were grouped-housed  
601 unless they had undergone a major survival surgery. Dual fiber imaging of ChAT neuron  
602 GCaMP fluorescence in GP/SI and HDB was performed in 11 ChAT+/GCaMP+ mice, four of  
603 which were used for additional histological quantification. Fiber imaging of ACh3.0 sensor  
604 fluorescence in ACtx was performed in 10 ChAT+/GCaMP- mice.

605

## 606 **Surgical procedure for GCaMP photometry**

607 Mice were anesthetized with isoflurane in oxygen (5% induction, 2% maintenance) and placed  
608 in a stereotaxic frame (Kopf Model 1900). A homeothermic blanket system was used to  
609 maintain body temperature at 36.6° (FHC). Lidocaine hydrochloride was administered  
610 subcutaneously to numb the scalp. The dorsal surface of the scalp was retracted and the  
611 periosteum was removed. Dual optic fiber implants (Doric, 400 $\mu$ m core 0.48NA, 1.25mm  
612 diameter low-autofluorescence metal ferrule) were slowly lowered into HDB (0.9 x 0.3 x 4.7)  
613 and GP/SI (2.5 x -1.5 x 3.3 mm from bregma, [lateral x caudal x ventral]) in the right



614 hemisphere. Silicon adhesive (WPI Kwik-Sil) was applied to the exposed brain surface. The  
615 exposed skull surface was prepped with etchant (C&B metabond) and 70% ethanol before  
616 affixing a titanium head plate (iMaterialise) to the skull with dental cement (C&B Metabond). At  
617 the conclusion of the procedure, Buprenex (0.05 mg/kg) and meloxicam (0.1 mg/kg) were  
618 administered and the animal was transferred to a warmed recovery chamber.

## 619

### 620 **Surgical procedure for acetylcholine sensor photometry**

621 The initial surgical procedures and perioperative care were similar to that for GCaMP  
622 photometry. The skull overlying the right ACtx exposed by moving the temporalis muscle. A  
623 burr hole was made on the temporal ridge at 2.9mm posterior to bregma, using a 31-gauge  
624 needle. A motorized injection system (Stoelting) was used to inject 200nL of AAV9-hSyn-  
625 ACh3.0 (diluted 10% in sterile saline from  $3.45 \times 10^{13}$  genome copies/mL) via a pulled glass  
626 micropipette 0.5mm below the pial surface. We waited at least 10 minutes following the  
627 injection before withdrawing the micropipette. A tapered fiber (Optogenix, NA 0.39, diameter  
628 200  $\mu\text{m}$ , active length 1.0 mm) was implanted 1mm below the pial surface and secured using  
629 dental cement dyed with India Ink, which also secured the titanium head plate. Sensor  
630 photometry experiments began three weeks following the injection.

## 631

### 632 **Pupillometry**

633 Mice were placed in an electrically conductive cradle and habituated to head-fixation during  
634 three sessions of 15, 30, and 60 minutes over three consecutive days. Video recordings of the  
635 pupil under iso-luminous background conditions were performed during the final habituation  
636 session and the following sensory characterization day. Video recordings were made at 30Hz  
637 with a CMOS camera (Teledyne Dalsa, model M2020) outfitted with a lens (Tamron 032938)  
638 and infrared longpass filter (Midopt Ip830-25.5). Automated analysis of pupil diameter follows  
639 the procedure described previously by McGinley and colleagues (McGinley et al., 2015a).  
640 Briefly, each movie was thresholded such that most pixel values within the pupil were below  
641 threshold and all other pixels were above threshold. A circle was fit to the pupil by first  
642 calculating the center of mass within the pupil and then centering a circle with the  
643 corresponding area to that point. Canny edge detection was then used to identify edge pixels  
644 within each grayscale image. Edge pixels were removed if they were more than 3 pixels away  
645 from a pupil pixel or outside of an annulus with diameters that were 0.5 and 1.75 the diameter  
646 of the initial fit circle. As a final step, an ellipse was fit to the remaining edge pixels using least-  
647 squares regression and the pupil diameter was defined from the diameter of a circle with a  
648 matching area. This procedure was performed for each image frame using a Matlab  
649 (Mathworks) script adapted from the original publication (McGinley et al., 2015a).

650

651 Pupil diameter for ACh3.0 sensor imaging experiments was extracted using DeepLabCut  
652 (version 2.1.8.2, Nath et al., 2019). Specifically, three investigators each labeled 100 frames  
653 taken from 10 mice, for a total of 300 frames from 30 mice. The four cardinal and four  
654 intercardinal compass points were marked for each pupil. Marker placement was confirmed by

655 at least one additional investigator. Training was performed on 95% of frames. We used a  
656 ResNet-101 based neural network with default parameters for 1,030,000 training iterations. We  
657 then used a p-value cutoff of 0.9 to condition the X,Y coordinates for analysis. This network  
658 was then used to analyze videos from similar experimental settings from the ten ACh3.0  
659 sensor imaging mice. We calculated pupil diameter for each frame by fitting an ellipse to the  
660 identified pupil contour points using a least-squares criterion and calculating the long axis  
661 diameter.

662

## 663 **Operant behavioral testing**

664 All mice proceeded through the same series of tests beginning two weeks following fiber  
665 implant surgery (Figure 2A). On sessions 1 and 2, mice were habituated to head fixation and  
666 the body cradle. On session 3, pupillometry was performed without sensory stimulation. On  
667 session 4, pupillometry and fiber imaging was performed in response to the presentation of  
668 auditory or visual stimuli. Beginning on day 5, mice were placed on water restriction and were  
669 monitored until they reached 80% of their baseline weight. Beginning on day 8 or 9, after  
670 several days of behavioral shaping, mice began appetitive operant training that rewarded  
671 vigorous licking shortly following the presentation of three different tone frequencies. Finally,  
672 on day 13-22, mice were switched to a reinforcement reversal task, where two of the  
673 previously rewarded frequencies were switched to neutral or aversive reinforcement. These  
674 methods for each of these stages are provided in detail below.

675

### 676 Sensory characterization:

677 Visual gratings were generated in Matlab using the Psychtoolbox extension and presented via  
678 an 800 x 480 pixel display (Adafruit 2406) positioned approximately 15cm from the left eye 45  
679 degrees off midline. Visual gratings were presented with a spatial frequency of 0.035 cycles  
680 per degree at three contrasts: 11%, 33%, and 100%. Gratings (2s duration) were presented at  
681 both vertical and horizontal orientations. Spatial drift (2Hz) was imposed along the orthogonal  
682 axis to orientation.

683 Auditory stimuli were either pure tones or auditory drifting gratings (i.e., ripples). Stimuli were  
684 generated with a 24-bit digital-to-analog converter (National Instruments model PXI-4461) and  
685 presented via a free-field speaker (CUI, CMS0201KLX) placed approximately 10 cm from the  
686 left (contralateral) ear canal. Free-field stimuli were calibrated using a wide-band free-field  
687 microphone (PCB Electronics, 378C01). Pure tones were low (either 6 or 6.8 kHz), mid (9.5 or  
688 11.3 kHz), or high (13.9 or 18.5 kHz) frequencies presented at 3 intensities (30, 50, and 70 dB  
689 SPL). Tones were 0.4s duration shaped with 5ms raised cosine onset and offset ramps.  
690 Auditory gratings ranged from 2-45kHz with 2s duration (5ms raised cosine onset and offset  
691 ramps), presented at downward and upward frequency trajectories (at -2 and +2 Hz) at three  
692 intensities (30, 50, and 70 dB SPL). The spectrum was shaped with 20 frequency carriers per  
693 octave that were sinusoidally modulated with 90% depth at 1 cycle per octave.

694 A single block consisted of 22 unique stimulus trials with a 7s inter-trial interval (6 visual  
695 gratings [2 orientations x 3 contrasts], 9 tones [3 frequencies x 3 levels], 6 auditory gratings [2  
696 directions x 3 intensities] and 1 silent trial where neither an auditory nor visual stimulus was  
697 presented). The stimulus order was randomly determined for each of 20 presentation blocks.

#### 698 Operant training:

699 Behavioral shaping for the rewarded tone detection task began after the sensory  
700 characterization session. In the initial phase of training, mice learned to vigorously lick a spout  
701 shortly following tone onset (low-, mid-, or high-frequency, as specified above at 70 dB SPL) in  
702 order receive a liquid reward (10% sucrose in water, 1.5  $\mu$ L per reward, 1 reward per trial).  
703 Initially, tones were paired with rewards (i.e., Pavlovian conditioning), initiated 0.5s after tone  
704 onset. Fiber imaging was not performed during behavioral shaping.

705 Once mice were reliably licking prior to reward onset, the requirement to trigger reward  
706 delivery (i.e., operant conditioning) was progressively increased. The licking criterion to receive  
707 a reward was 7 lickspout contacts within a 2.8s period beginning 0.2s after stimulus onset,  
708 where the interval between any two consecutive licks could not exceed 1s. Individual trials  
709 were scored as hits, according to the criterion above, misses (no licks), or partial hits (lickspout  
710 contact that did not meet the criterion above). Intertrial intervals were determined randomly  
711 from a truncated exponential distribution within a range of 7-10s. Trials were aborted in the  
712 event of lick spout contact in a withhold period of 2s (initial phase) or 1.5s (after reversal)  
713 preceding stimulus onset. Generally, mice learned to produce 7 licks in 2.8s to initiate reward  
714 with low false alarm rates within 2-3 sessions.

715 In order to analyze licking-related activity, separate lick bouts were also selected from the  
716 inter-trial periods. Lick bouts were defined as at least two lick contacts less than 250ms apart,  
717 bookended by quiescent lick-free periods at least 1s each before and after the bout.

718 Once the reward rate exceeded 70% across all frequencies for at least one session, mice were  
719 transitioned to the reversal stage of the operant task in which one of the three tones remained  
720 associated with reward, one was associated with shock, and a third was not associated with  
721 reward or punishment (i.e., neutral outcome). The assignment of tone frequency to  
722 reinforcement condition was randomized across mice. Punishment was delivered by briefly  
723 electrifying the lick spout (0.6mA for 0.4s) once the lick bout threshold (7 licks in 2.8s) had  
724 been crossed. During this stage, the rewarded tone was presented on 50% of trials and the  
725 punished and neutral tones were each presented on 25% of trials. Operant testing was  
726 terminated once the Go probability stabilized across all tone frequencies for at least two  
727 consecutive days.

#### 728 **Fiber photometry**

##### 729 Data acquisition:

730 LEDs of different wavelengths provided a basis for separating calcium-dependent (465 nm)  
731 and calcium-independent (405nm) fluorescence. Blue and purple LEDs were modulated at  
732 210Hz and 330Hz, respectively, and combined through an integrated fluorescence mini-cube

733 (FMC4, Doric). The power at the tip of the patch cable was 0.1 - 0.2mW. The optical patch  
734 cable was connected to the fiber implant via a zirconia mating sleeve. Bulk fluorescent signals  
735 were acquired with a femtowatt photoreceiver (2151, Newport) and digital signal processor  
736 (Tucker-Davis Technologies RZ5D). The signal was demodulated by the lock-in amplifier  
737 implemented in the processor, sampled at 1017Hz and low-pass filtered with a corner  
738 frequency at 20Hz. The optical fibers were prebleached overnight by setting both LEDs to  
739 constant illumination at a low power (<50uW).

740 Data processing: After demodulation, the 465nm GCaMP responses were calculated as the  
741 fractional change in fluorescence  $DF/F_0$ , where  $F_0$  was defined as the running median  
742 fluorescence value in a 60s time window.  $DF/F_0$  traces were then low-pass filtered with a 2<sup>nd</sup>  
743 order zero-lag Butterworth filter, with a cut-off frequency set to 7Hz. Event-related  $DF/F_0$   
744 values were then z-scored relative to baseline activity levels. For passive sensory  
745 characterization experiments, the baseline distribution consisted of all  $DF/F_0$  recorded during a  
746 2s window preceding visual or auditory stimulus onset. For recordings made during the  
747 operant task, the baseline distribution consisted of all  $DF/F_0$  recorded during a 2s period prior  
748 to auditory cue onset that was combined across trial types and sessions.

749 Data analysis: To measure the relationship with spontaneous pupil fluctuations (Figure 1),  
750 photometry data were first downsampled to 30Hz before measuring coherence with a  
751 hamming window of 1500 samples and 1400 sample overlap. Lag was defined by the peak of  
752 the cross-correlation between fluorescence (GCaMP or ACh3.0) and pupil fluctuations. Event-  
753 related response amplitudes (Figures 2-7) were calculated on an individual trial basis. To  
754 measure sensory-evoked response amplitudes (Figure 2C and Figure 2 – Figure supplement  
755 1), the mean fractional change during a 2s pre-stimulus baseline was subtracted from both the  
756 peak fractional change during the 2s stimulus period as well as a 0.4s period immediately  
757 preceding stimulus onset. The sensory-evoked response amplitude was then calculated as  
758 post – pre. The amplitude of spontaneous transients (Figure 2G) were calculated on trials  
759 where neither an auditory nor visual stimulus was presented. A threshold was applied to  $DF/F_0$   
760 values for each trial to identify time points corresponding to the bottom 5% of fractional change  
761 values. Spontaneous transients were operationally defined as any time point containing a  
762 value that was at least 0.5 z-scores above the 5% threshold. Spontaneous activity was then  
763 quantified as the mean value for all suprathreshold values within the trial. Time windows used  
764 to calculate the various event-related response amplitudes related to the behavioral task  
765 (Figures 3-7) are defined in the corresponding figure legends.

766 To determine whether BFCN activity in the period just before or just after presentation of the  
767 target sound could be used to classify behavioral outcomes (hit vs miss), we used a support  
768 vector machine classifier (SVM) with a linear kernel. We fit the classifier model to a data matrix  
769 consisting of the fractional change in fluorescence (binned at 10ms resolution) either during a  
770 1s period preceding tone presentation or a 400ms period following the onset of tone  
771 presentation. We used principal components analysis to reduce dimensionality of the data  
772 matrix before classification. We then used only the principal components needed to account for  
773 90% of the variance in the data for the SVM-based classification. Leave one-out cross-  
774 validation was then used to train the classifier and compute a misclassification rate on the

775 untrained trial. This process was then iterated 50 times, each time ensuring an equivalent  
776 number of hit and miss trials in the sample by randomly downsampling the hit trials. We  
777 repeated this process for each imaging session independently and calculated the mean  
778 decoding accuracy across sessions for each mouse. As a control we randomly assigned the hit  
779 and miss labels to confirm that classification accuracy was at chance. The SVM training and  
780 cross-validation procedure was carried out in MATLAB using the 'fitsvm', and 'predict'  
781 functions.

782

## 783 **Histology**

784 At the conclusion of imaging, mice were deeply anesthetized and prepared for transcatheter  
785 perfusion with a 4% formalin solution in 0.1M phosphate buffer. The brains were extracted and  
786 post-fixed at room temperature for an additional 12 hours before transfer to 30% sucrose  
787 solution. For all brains, the location of the fiber tip center was identified and translated to a  
788 reference atlas of the adult mouse brain created by the Allen Institute for Brain Science (as  
789 shown in Figure 1 – Figure Supplement 1).

790

791 In a subset of brains (N=4), coronal sections (30um) were rinsed for 1 hour in 0.1M phosphate  
792 buffered saline (PBS) and 0.4% Triton-X, and then permeabilized for 1 hour with 1% Triton-X  
793 and 5% normal horse serum. Sections were incubated overnight in blocking solution  
794 containing the primary antibodies (Goat anti-ChAT 1:100, Millipore, AB144P). Sections were  
795 rinsed in PBS then incubated for 2 hours at room temperature in blocking solution containing  
796 secondary antibodies, counterstained in DAPI for 5 minutes, rinsed in PBS, mounted onto  
797 glass slides, and then coverslipped. Co-localization of ChAT and GCaMP was quantified in the  
798 HDB and GP/ST regions of interest immediately beneath the fiber tip and in the corresponding  
799 region in the contralateral hemisphere. Quantification of ChAT and GCaMP was also  
800 performed in the striatum from both hemispheres of the same sections. Regions of interest  
801 were imaged at 63x using a Leica DM5500B fluorescent microscope. Tiled image stacks were  
802 then separated into individual fluorophore channels and labeled cells were manually counted in  
803 each channel independently using Adobe Photoshop.

804

## 805 **Statistics**

806 All statistical analyses were performed in MATLAB 2016b (Mathworks). Data are reported as  
807 mean  $\pm$  SEM unless otherwise indicated. Inflated familywise error rates from multiple  
808 comparisons of the same sample were adjusted with the Holm-Bonferroni correction. Statistical  
809 significance was defined as  $p < 0.05$ . For fiber-based imaging, we did not exclude any trials or  
810 mice from our analysis. For pupil imaging during BFCN calcium recordings, four mice were  
811 excluded from pupil analysis because the automated algorithm failed to identify the perimeter  
812 of the pupil.

813

814

## **Acknowledgements**

815 These studies were supported by NIH grant DC017078 (DP), The Nancy Lurie Marks Family  
816 Foundation (DP), a Herchel Smith Harvard Scholarship (BR), a Fondation Zdenek et Michaela  
817 Bakala Scholarship (BR), and NIH grant K08MH116135 (EK).

818

819 BR collected and analyzed the combined calcium imaging, pupillometry and behavioral data.  
820 EK, YW, and TC collected and analyzed the combined ACh3.0 sensor and pupillometry data.  
821 MJ and YL developed the ACh3.0 sensor purchased for use in these experiments. BR and DP  
822 designed the experiments. DP and BR prepared the figures. DP wrote the manuscript, with  
823 input from all authors.

824

825 We thank Ken Hancock for programming additional changes in his behavioral neurophysiology  
826 data collection software. We thank Matt McGinley for hardware advice and software support  
827 for pupil diameter quantification. We thank Troy Hackett for support developing our  
828 immunolabeling and histology quantification protocols.

829

830

### 831 **Competing interests**

832 The authors declare that no competing interests exist.

833

834

835

836

837

838

839

840

841

842

843

844

845

846

847

848

849

850

851

852

853

854

855

856

857

858

## References

- 859 Becket Ebitz R, Moore T. 2019. Both a gauge and a filter: Cognitive modulations of pupil size.  
860 *Frontiers in Neurology* **10**:1–14. doi:10.3389/fneur.2018.01190
- 861 Bloem B, Schoppink L, Rotaru DC, Faiz A, Hendriks P, Mansvelter HD, van de Berg WDJ,  
862 Wouterlood FG. 2014. Topographic mapping between basal forebrain cholinergic neurons and  
863 the medial prefrontal cortex in mice. *Journal of Neuroscience* **34**:16234–16246.  
864 doi:10.1523/JNEUROSCI.3011-14.2014
- 865 Buzsaki G, Bickford RG, Ponomareff G, Thal LJ, Mandel R, Gage FH. 1988. Nucleus basalis and  
866 thalamic control of neocortical activity in the freely moving rat. *Journal of Neuroscience*  
867 **8**:4007–4026. doi:10.1523/jneurosci.08-11-04007.1988
- 868 Chavez C, Zaborszky L. 2017. Basal forebrain cholinergic-auditory cortical network: primary versus  
869 nonprimary auditory cortical areas. *Cerebral Cortex* **27**:2335–2347. doi:10.1093/cercor/bhw091
- 870 Chen E, Lallai V, Sherfat Y, Grimes NP, Pushkin AN, Fowler JP, Fowler CD. 2018. Altered baseline  
871 and nicotine-mediated behavioral and cholinergic profiles in ChAT-Cre mouse lines. *Journal of*  
872 *Neuroscience* **38**:2177–2188. doi:10.1523/JNEUROSCI.1433-17.2018
- 873 Chernyshev B V., Weinberger NM. 1998. Acoustic frequency tuning of neurons in the basal forebrain of  
874 the waking guinea pig. *Brain Research* **793**:79–94. doi:10.1016/S0006-8993(98)00163-2
- 875 Chubykin AA, Roach EB, Bear MF, Shuler MGH. 2013. A cholinergic mechanism for reward timing  
876 within primary visual cortex. *Neuron* **77**:723–735. doi:10.1016/j.neuron.2012.12.039
- 877 Clayton KK, Williamson RS, Hancock KE, Tasaka G, Mizrahi A, Hackett TA, Polley DB. 2020.  
878 Auditory corticothalamic neurons Are recruited by motor preparatory inputs. *Current Biology*  
879 **31**:1–13. doi:10.1016/j.cub.2020.10.027
- 880 Crouse RB, Kim K, Batchelor HM, Girardi EM, Kamaletdinova R, Chan J, Rajebhosale P, Pittenger ST,  
881 Role LW, Talmage DA, Jing M, Li Y, Gao XB, Mineur YS, Picciotto MR. 2020. Acetylcholine  
882 is released in the basolateral amygdala in response to predictors of reward and enhances the  
883 learning of cue-reward contingency. *eLife* **9**:1–31. doi:10.7554/ELIFE.57335
- 884 David S V, Fritz JB, Shamma SA. 2012. Task reward structure shapes rapid receptive field plasticity in  
885 auditory cortex. *Proceedings of the National Academy of Sciences* **109**:2144–2149.  
886 doi:10.1073/pnas.1117717109
- 887 Disney AA, Higley MJ. 2020. Diverse spatiotemporal scales of cholinergic signaling in the neocortex.  
888 *Journal of Neuroscience* **40**:720–725. doi:10.1523/JNEUROSCI.1306-19.2019
- 889 Do JP, Xu M, Lee SH, Chang WC, Zhang S, Chung S, Yung TJ, Fan JL, Miyamichi K, Luo L, Dan Y.  
890 2016. Cell type-specific long-range connections of basal forebrain circuit. *eLife* **5**:1–18.  
891 doi:10.7554/eLife.13214
- 892 Edeline JM, Weinberger NM. 1992. Associative retuning in the thalamic source of input to the amygdala  
893 and auditory cortex: receptive field plasticity in the medial division of the medial geniculate  
894 body. *Behavioral Neuroscience* **106**:81–105. doi:10.1037/0735-7044.106.1.81
- 895 Everitt BJ, Robbins TW. 1997. Central cholinergic systems and cognition. *Annual Review of Psychology*  
896 **48**:649–684. doi:10.1146/annurev.psych.48.1.649
- 897 Froemke RC. 2015. Plasticity of cortical excitatory-inhibitory balance. *Annual Review of Neuroscience*  
898 **38**:195–219. doi:10.1146/annurev-neuro-071714-034002
- 899 Froemke RC, Carcea I, Barker AJ, Yuan K, Seybold BA, Martins ARO, Zaika N, Bernstein H, Wachs  
900 M, Levis PA, Polley DB, Merzenich MM, Schreiner CE. 2013. Long-term modification of  
901 cortical synapses improves sensory perception. *Nature neuroscience* **16**:79–88.  
902 doi:10.1038/nn.3274
- 903 Gielow MR, Zaborszky L. 2017. The Input-Output Relationship of the Cholinergic Basal Forebrain. *Cell*  
904 *Reports* **18**:1817–1830. doi:10.1016/j.celrep.2017.01.060

- 905 Grewe BF, Gründemann J, Kitch LJ, Lecoq JA, Parker JG, Marshall JD, Larkin MC, Jercog PE, Grenier  
906 F, Li JZ, Lüthi A, Schnitzer MJ. 2017. Neural ensemble dynamics underlying a long-term  
907 associative memory. *Nature* **543**:670–675. doi:10.1038/nature21682
- 908 Gritti I, Henny P, Galloni F, Mainville L, Mariotti M, Jones BE. 2006. Stereological estimates of the  
909 basal forebrain cell population in the rat, including neurons containing choline acetyltransferase,  
910 glutamic acid decarboxylase or phosphate-activated glutaminase and colocalizing vesicular  
911 glutamate transporters. *Neuroscience* **143**:1051–1064. doi:10.1016/j.neuroscience.2006.09.024
- 912 Gründemann J. 2021. Distributed coding in auditory thalamus and basolateral amygdala upon  
913 associative fear learning. *Current Opinion in Neurobiology* **67**:183–189.  
914 doi:10.1016/j.conb.2020.11.014
- 915 Guo W, Robert B, Polley DB. 2019. The cholinergic basal forebrain links auditory stimuli with delayed  
916 reinforcement to support learning. *Neuron* **103**. doi:10.1016/j.neuron.2019.06.024
- 917 Hangya B, Ranade SP, Lorenc M, Kepecs A. 2015. Central cholinergic neurons are rapidly recruited by  
918 reinforcement feedback. *Cell* **162**:1155–1168. doi:10.1016/j.cell.2015.07.057
- 919 Harrison TC, Pinto L, Brock JR, Dan Y. 2016. Calcium imaging of basal forebrain activity during innate  
920 and learned behaviors. *Frontiers in Neural Circuits* **10**:1–12. doi:10.3389/fncir.2016.00036
- 921 Jing M, Li Yuexuan, Zeng J, Huang P, Skirzewski M, Kljakic O, Peng W, Qian T, Tan K, Zou J, Trinh  
922 S, Wu R, Zhang S, Pan S, Hires SA, Xu M, Li H, Saksida LM, Prado VF, Bussey TJ, Prado  
923 MAM, Chen L, Cheng H, Li Yulong. 2020. An optimized acetylcholine sensor for monitoring in  
924 vivo cholinergic activity. *Nature Methods* **17**:1139–1146. doi:10.1038/s41592-020-0953-2
- 925 Kamke MR, Brown M, Irvine DRF. 2005. Origin and immunolesioning of cholinergic basal forebrain  
926 innervation of cat primary auditory cortex. *Hearing Research* **206**:89–106.  
927 doi:10.1016/j.heares.2004.12.014
- 928 Kim T, Thankachan S, McKenna JT, McNally JM, Yang C, Choi JH, Chen L, Kocsis B, Deisseroth K,  
929 Strecker RE, Basheer R, Brown RE, McCarley RW. 2015. Cortically projecting basal forebrain  
930 parvalbumin neurons regulate cortical gamma band oscillations. *Proceedings of the National  
931 Academy of Sciences* **112**:201413625. doi:10.1073/pnas.1413625112
- 932 Kuchibhotla K V, Gill J V, Lindsay GW, Papadoyannis ES, Field RE, Sten TAH, Miller KD, Froemke  
933 RC. 2017. Parallel processing by cortical inhibition enables context-dependent behavior. *Nature  
934 Neuroscience* **20**:62–71.
- 935 Laszlovszky T, Schlingloff D, Hegedüs P, Freund TF, Gulyás A, Kepecs A, Hangya B. 2020. Distinct  
936 synchronization, cortical coupling and behavioral function of two basal forebrain cholinergic  
937 neuron types. *Nature Neuroscience* **23**:992–1003. doi:10.1038/s41593-020-0648-0
- 938 Lein ES, Hawrylycz MJ, Ao N, Ayres M, Bensinger A, Bernard A, Boe AF, Boguski MS, Brockway  
939 KS, Byrnes EJ, Chen Lin, Chen Li, Chen TM, Chin MC, Chong J, Crook BE, Czaplinska A,  
940 Dang CN, Datta S, Dee NR, Desaki AL, Desta T, Diep E, Dolbeare TA, Donelan MJ, Dong HW,  
941 Dougherty JG, Duncan BJ, Ebbert AJ, Eichele G, Estin LK, Faber C, Facer BA, Fields R,  
942 Fischer SR, Fliss TP, Frensley C, Gates SN, Glattfelder KJ, Halverson KR, Hart MR, Hohmann  
943 JG, Howell MP, Jeung DP, Johnson RA, Karr PT, Kawal R, Kidney JM, Knapik RH, Kuan CL,  
944 Lake JH, Laramie AR, Larsen KD, Lau C, Lemon TA, Liang AJ, Liu Y, Luong LT, Michaels J,  
945 Morgan JJ, Morgan RJ, Mortrud MT, Mosqueda NF, Ng LL, Ng R, Orta GJ, Overly CC, Pak  
946 TH, Parry SE, Pathak SD, Pearson OC, Puchalski RB, Riley ZL, Rockett HR, Rowland SA,  
947 Royall JJ, Ruiz MJ, Sarno NR, Schaffnit K, Shapovalova NV, Svisay T, Slaughterbeck CR,  
948 Smith SC, Smith KA, Smith BI, Sordt AJ, Stewart NN, Stumpf KR, Sunkin SM, Sutram M, Tam  
949 A, Teemer CD, Thaller C, Thompson CL, Varnam LR, Visel A, Whitlock RM, Wohnoutka PE,  
950 Wolkey CK, Wong VY, Wood M, Yaylaoglu MB, Young RC, Youngstrom BL, Yuan XF,  
951 Zhang B, Zwingman TA, Jones AR. 2007. Genome-wide atlas of gene expression in the adult  
952 mouse brain. *Nature* **445**:168–176. doi:10.1038/nature05453



- 953 Letzkus JJ, Wolff SBE, Lüthi A. 2015. Disinhibition, a circuit mechanism for associative learning and  
954 memory. *Neuron* **88**:264–276. doi:10.1016/j.neuron.2015.09.024
- 955 Letzkus JJ, Wolff SBE, Meyer EMM, Tovote P, Courtin J, Herry C, Lüthi A. 2011. A disinhibitory  
956 microcircuit for associative fear learning in the auditory cortex. *Nature* **480**:331–335.  
957 doi:10.1038/nature10674
- 958 Li X, Yu B, Sun Q, Zhang Y, Ren M, Zhang X, Li A, Yuan J, Madisen L, Luo Q, Zeng H, Gong H, Qiu  
959 Z. 2018. Generation of a whole-brain atlas for the cholinergic system and mesoscopic  
960 projectome analysis of basal forebrain cholinergic neurons. *Proceedings of the National  
961 Academy of Sciences of the United States of America* **115**:415–420.  
962 doi:10.1073/pnas.1703601115
- 963 Lin S-CC, Nicolelis MAL. 2008. Neuronal ensemble bursting in the basal forebrain encodes salience  
964 irrespective of valence. *Neuron* **59**:138–149. doi:10.1016/j.neuron.2008.04.031
- 965 Lohani S, Moberly AH, Benisty H, Landa B, Jing M, Li Y, Higley MJ, Cardin JA. 2021. Dual color  
966 mesoscopic imaging reveals spatiotemporally heterogeneous coordination of cholinergic and  
967 neocortical activity. *bioRxiv* 2020.12.09.418632. doi:10.1101/2020.12.09.418632
- 968 Maho C, Hars B, Edeline JM, Hennevin E. 1995. Conditioned changes in the basal forebrain: Relations  
969 with learning-induced cortical plasticity. *Psychobiology* **23**:10–25. doi:10.3758/BF03327054
- 970 McGinley MJ, David S V., McCormick DA. 2015a. Cortical membrane potential signature of optimal  
971 states for sensory signal detection. *Neuron* **87**:179–192. doi:10.1016/j.neuron.2015.05.038
- 972 McGinley MJ, Vinck M, Reimer J, Batista-Brito R, Zaghera E, Cadwell CR, Tolias AS, Cardin JA,  
973 McCormick DA. 2015b. Waking state: rapid variations modulate neural and behavioral  
974 responses. *Neuron* **87**:1143–1161. doi:10.1016/j.neuron.2015.09.012
- 975 Menegas W, Akiti K, Amo R, Uchida N, Watabe-Uchida M. 2018. Dopamine neurons projecting to the  
976 posterior striatum reinforce avoidance of threatening stimuli. *Nature Neuroscience* **21**:1421–  
977 1430. doi:10.1038/s41593-018-0222-1
- 978 Metherate R, Cox CL, Ashe JH. 1992. Cellular bases of neocortical activation: Modulation of neural  
979 oscillations by the nucleus basalis and endogenous acetylcholine. *Journal of Neuroscience*  
980 **12**:4701–4711. doi:10.1523/jneurosci.12-12-04701.1992
- 981 Monosov IE. 2020. How outcome uncertainty mediates attention, learning, and decision-making. *Trends  
982 in Neurosciences* **43**:795–809. doi:10.1016/j.tins.2020.06.009
- 983 Nasirova N, Quina LA, Agosto-Marlin IM, Ramirez JM, Lambe EK, Turner EE. 2020. Dual  
984 recombinase fate mapping reveals a transient cholinergic phenotype in multiple populations of  
985 developing glutamatergic neurons. *Journal of Comparative Neurology* **528**:283–307.  
986 doi:10.1002/cne.24753
- 987 Nath T, Mathis A, Chen AC, Patel A, Bethge M, Mathis MW. 2019. Using DeepLabCut for 3D  
988 markerless pose estimation across species and behaviors. *Nature Protocols* **14**:2152–2176.  
989 doi:10.1038/s41596-019-0176-0
- 990 Nelson A, Mooney R. 2016. The basal forebrain and motor cortex provide convergent yet distinct  
991 movement-related inputs to the auditory cortex. *Neuron* **90**:635–648.  
992 doi:10.1016/j.neuron.2016.03.031
- 993 Parikh V, Kozak R, Martinez V, Sarter M. 2007. Prefrontal acetylcholine release controls cue detection  
994 on multiple timescales. *Neuron* **56**:141–154. doi:10.1016/j.neuron.2007.08.025
- 995 Pisano F, Pisanello M, Lee SJ, Lee J, Maglie E, Balena A, Sileo L, Spagnolo B, Bianco M, Hyun M, De  
996 Vittorio M, Sabatini BL, Pisanello F. 2019. Depth-resolved fiber photometry with a single  
997 tapered optical fiber implant. *Nature Methods* **16**:1185–1192. doi:10.1038/s41592-019-0581-x
- 998 Reimer J, McGinley MJ, Liu Y, Rodenkirch C, Wang Q, McCormick DA, Tolias AS. 2016. Pupil  
999 fluctuations track rapid changes in adrenergic and cholinergic activity in cortex. *Nature  
1000 Communications* **7**:13289. doi:10.1038/ncomms13289

- 1001 Resnik J, Polley DB. 2021. Cochlear neural degeneration disrupts hearing in background noise by  
1002 increasing auditory cortex internal noise. *Neuron* 1–13. doi:10.1016/j.neuron.2021.01.015
- 1003 Rye DB, Wainer BH, Mesulam MM, Mufson EJ, Saper CB. 1984. Cortical projections arising from the  
1004 basal forebrain: A study of cholinergic and noncholinergic components employing combined  
1005 retrograde tracing and immunohistochemical localization of choline acetyltransferase.  
1006 *Neuroscience* **13**:627–643. doi:10.1016/0306-4522(84)90083-6
- 1007 Sarter M, Lustig C. 2020. Forebrain cholinergic signaling: Wired and phasic, not tonic, and causing  
1008 behavior. *Journal of Neuroscience* **40**:712–719. doi:10.1523/JNEUROSCI.1305-19.2019
- 1009 Sturgill JF, Hegedus P, Li SJ, Chevy Q, Siebels A, Jing M, Li Y, Hangya B, Kepecs A. 2020. Basal  
1010 forebrain-derived acetylcholine encodes valence-free reinforcement prediction error. *bioRxiv*.  
1011 doi:10.1101/2020.02.17.953141
- 1012 Takesian AE, Bogart LJ, Lichtman JW, Hensch TK. 2018. Inhibitory circuit gating of auditory critical-  
1013 period plasticity. *Nature Neuroscience* **21**:1–1. doi:10.1038/s41593-017-0064-2
- 1014 Taylor JA, Hasegawa M, Benoit CM, Freire JA, Theodore M, Ganea DA, Innocenti SM, Lu T,  
1015 Gründemann J. 2021. Single cell plasticity and population coding stability in auditory thalamus  
1016 upon associative learning. *Nature Communications* **12**:1–14. doi:10.1038/s41467-021-22421-8
- 1017 Teles-Grilo Ruivo LM, Baker KL, Conway MW, Kinsley PJ, Gilmour G, Phillips KG, Isaac JTR, Lowry  
1018 JP, Mellor JR. 2017. Coordinated acetylcholine release in prefrontal cortex and hippocampus is  
1019 associated with arousal and reward on distinct timescales. *Cell Reports* **18**:905–917.  
1020 doi:10.1016/j.celrep.2016.12.085
- 1021 Watabe-Uchida M, Uchida N. 2018. Multiple dopamine systems: Weal and woe of dopamine. *Cold  
1022 Spring Harbor Symposia on Quantitative Biology* **83**:83–95. doi:10.1101/sqb.2018.83.037648
- 1023 Weinberger NM. 2011. The medial geniculate, not the amygdala, as the root of auditory fear  
1024 conditioning. *Hearing Research* **274**:61–74. doi:10.1016/j.heares.2010.03.093
- 1025 Weinberger NM. 2004. Specific long-term memory traces in primary auditory cortex. *Nature Reviews  
1026 Neuroscience* **5**:279–290. doi:10.1038/nrn1366
- 1027 Yang C, Thankachan S, McCarley RW, Brown RE. 2017. The menagerie of the basal forebrain: how  
1028 many (neural) species are there, what do they look like, how do they behave and who talks to  
1029 whom? *Current Opinion in Neurobiology* **44**:159–166. doi:10.1016/j.conb.2017.05.004
- 1030 Zaborszky L, van den Pol A, Gyengesi E. 2012. The basal forebrain cholinergic projection system in  
1031 mice In: Watson C, Paxinos G, Puelles L, editors. *The Mouse Nervous System*. pp. 684–718.
- 1032 Zekveld AA, Koelewijn T, Kramer SE. 2018. The pupil dilation response to auditory stimuli: current  
1033 state of knowledge. *Trends in Hearing* **22**:1–25. doi:10.1177/2331216518777174
- 1034 Zhang G, Sun W, Zingg B, Shen L, He J, Xiong Y, Tao HW, Zhang LI. 2017. A non-canonical reticular-  
1035 limbic central auditory pathway via medial septum contributes to fear conditioning. *Neuron*  
1036 **97**:406-417.e4. doi:10.1016/j.neuron.2017.12.010
- 1037 Zhang K, Chen CD, Monosov IE. 2019. Novelty, salience, and surprise timing are signaled by neurons  
1038 in the basal forebrain. *Current Biology* **29**:134-142.e3. doi:10.1016/j.cub.2018.11.012
- 1039
- 1040
- 1041
- 1042
- 1043
- 1044
- 1045
- 1046
- 1047

1048  
1049  
1050  
1051  
1052  
1053  
1054  
1055  
1056  
1057  
1058  
1059  
1060  
1061  
1062  
1063

## **Figures and Figure Legends**

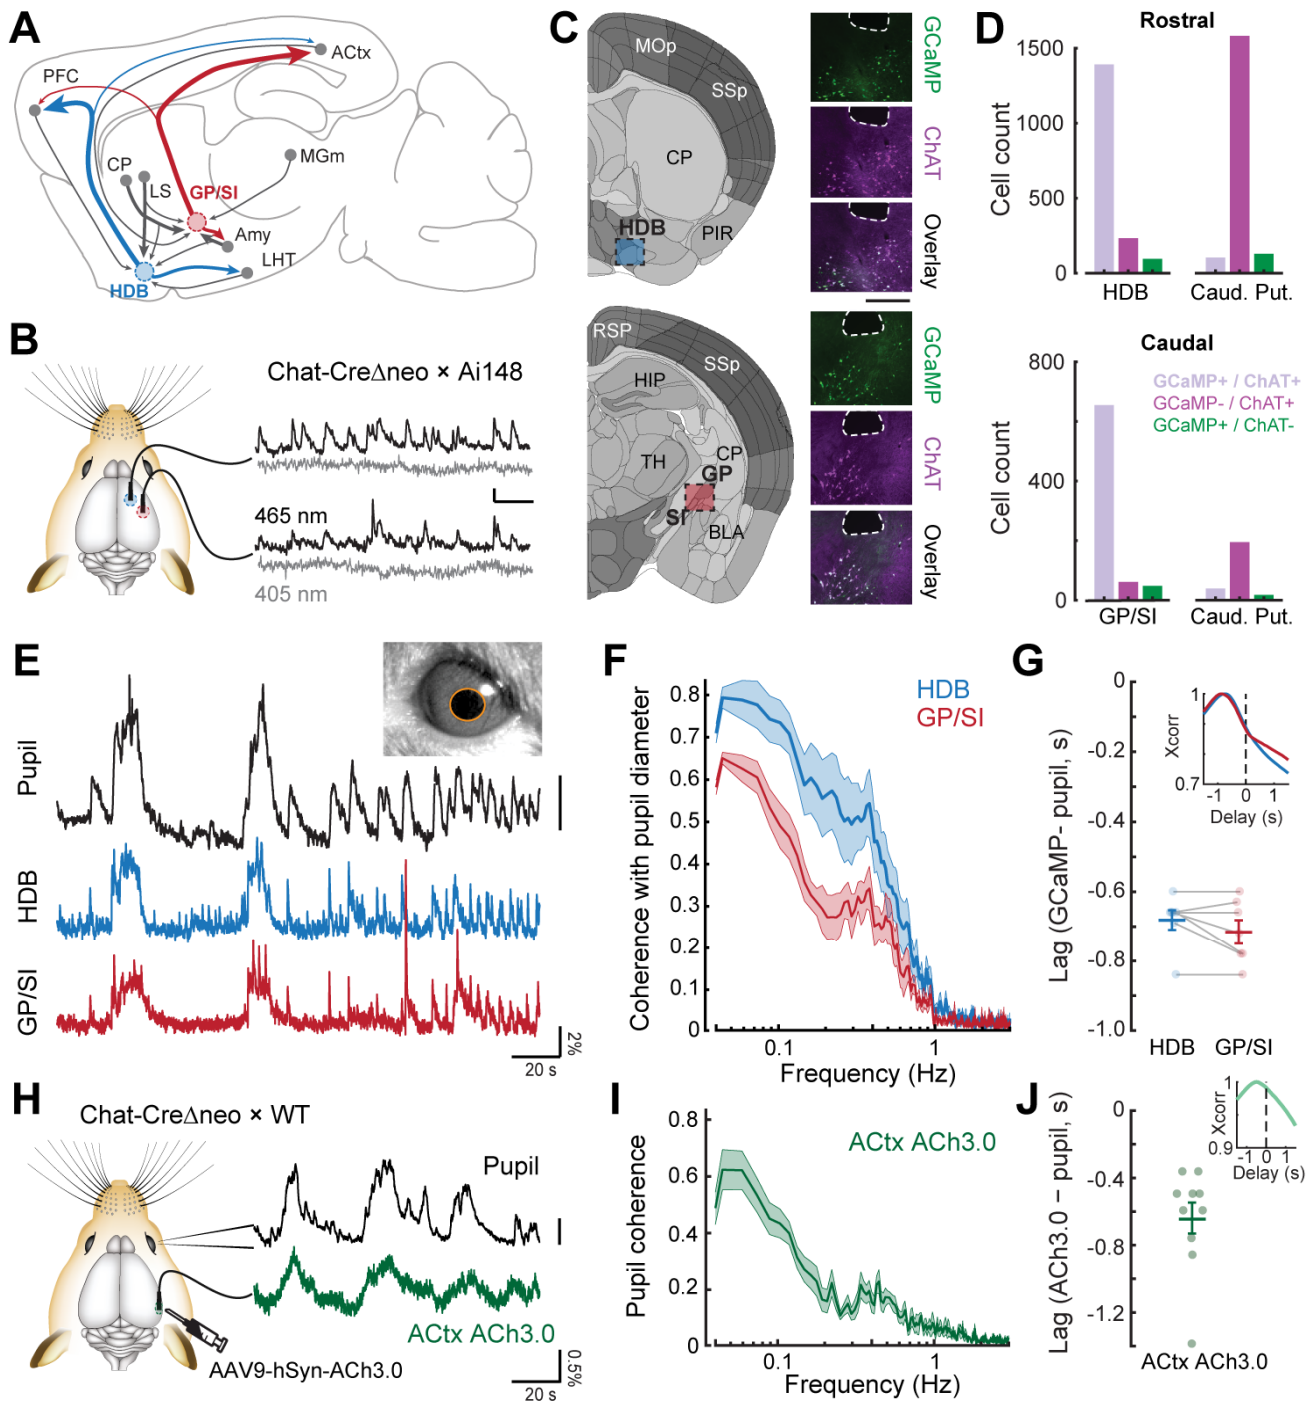

**Figure 1. Bulk BFCN activity and cortical acetylcholine release closely correspond with pupil-indexed global brain state.**

(A) Mid-sagittal diagram of the mouse brain depicting the diversity in major inputs (gray) and outputs (colored) between a rostroventral basal forebrain structure, the horizontal limb of the diagonal band (HDB), and the caudodorsal tail of the basal forebrain, the boundary of the globus pallidus and substantia innominata (GP/SI). ACtx = auditory cortex, MGm = medial subdivision of the medial geniculate body, LHT = lateral hypothalamus, Amy = amygdala, LS = lateral septum, CP = caudate putamen, PFC = prefrontal cortex.

1074 **(B)** Dual bulk fiber-based calcium imaging from basal forebrain cholinergic neurons was  
1075 performed from the HDB and GP/SI of ChAT-Cre- $\Delta$ neo  $\times$  Ai148 mice. Dual wavelength  
1076 imaging allowed separate visualization of calcium-independent fluorescence (405 nm) from  
1077 calcium-dependent fluorescence (465 nm). Vertical and horizontal scale bars reflect 1% DF/F  
1078 and 5 seconds, respectively.

1079 **(C)** Coronal diagrams are adapted from the adult mouse coronal reference atlas created by the  
1080 Allen Institute for Brain Science. Diagrams illustrate anatomical landmarks at the rostral (top)  
1081 and caudal (bottom) imaging locations. Post-mortem fluorescence photomicrographs of brain  
1082 sections immunolabeled for the ChAT protein depict the outline of the fiber path and the  
1083 position of HDB, GP, and SI. GCaMP and ChAT fluorescence channels and their overlay to  
1084 illustrate the strong co-localization of GCaMP in ChAT neurons within HDB and GP/SI regions  
1085 near the fiber tip. Scale bar = 0.5mm.

1086 **(D)** Cells from regions of interest below the fiber tip were counted based on their expression of  
1087 GCaMP-only (green), ChAT-only (magenta), or both GCaMP and ChAT (lavender). The same  
1088 analysis was performed on cells within the caudate putamen of the dorsal striatum. Numbers  
1089 indicate the number of neurons in the corresponding category.

1090 **(E)** Isoluminous spontaneous pupil dilations in an example mouse were visualized in  
1091 combination with GCaMP imaging from HDB and GP/SI. Pupil scale bar depicts a 5 pixel<sup>2</sup>  
1092 areal change.

1093 **(F)** Mean  $\pm$  SEM coherence of HDB and GP/SI GCaMP activity with pupil-indexed brain state  
1094 in isoluminous conditions without any explicit environmental stimuli or task demands. N = 7  
1095 mice provided data for pupil, HDB, and GP/SI. Basal forebrain GCaMP signals closely track  
1096 slow (< 0.5Hz) changes in pupil diameter, though the correspondence is stronger overall in  
1097 HDB than in GP/SI (2-way repeated measures ANOVA, main effect for brain structure, F =  
1098 12.58, p = 0.01).

1099 **(G)** HDB and GP/SI GCaMP changes lead pupil fluctuations by approximately 0.7s. *Inset:*  
1100 Cross-correlation of the HDB and GP/SI GCaMP signals with pupil fluctuations. Individual data  
1101 points depict the time value corresponding to the peak of the cross-correlograms from  
1102 individual mice. Mean  $\pm$  SEM values are provided at left and right.

1103 **(H)** Tapered fiber imaging of the ACh3.0 fluorescence during pupil videography. Scale bar  
1104 depicts a 5 pixel diameter change.

1105 **(I)** Mean  $\pm$  SEM coherence of ACtx ACh3.0 with pupil-indexed arousal in isoluminous  
1106 conditions without any explicit environmental stimuli or task demands. N = 10 mice. Pupil  
1107 coherence was qualitatively similar to GP/SI GCaMP coherence, which is expected on account  
1108 of its stronger anatomical projection to ACtx.

1109 **(J)** ACtx ACh3.0 changes lead pupil fluctuations by approximately 0.6s. *Inset:* Cross-  
1110 correlation of the ACtx ACh3.0 signal with pupil fluctuations. Individual data points depict the  
1111 time value corresponding to the peak of the cross-correlograms from individual mice. Mean  $\pm$   
1112 SEM values are provided at left and right.

1113  
1114  
1115

### Reconstruction of rostral fiber tip center locations from mice #1-11

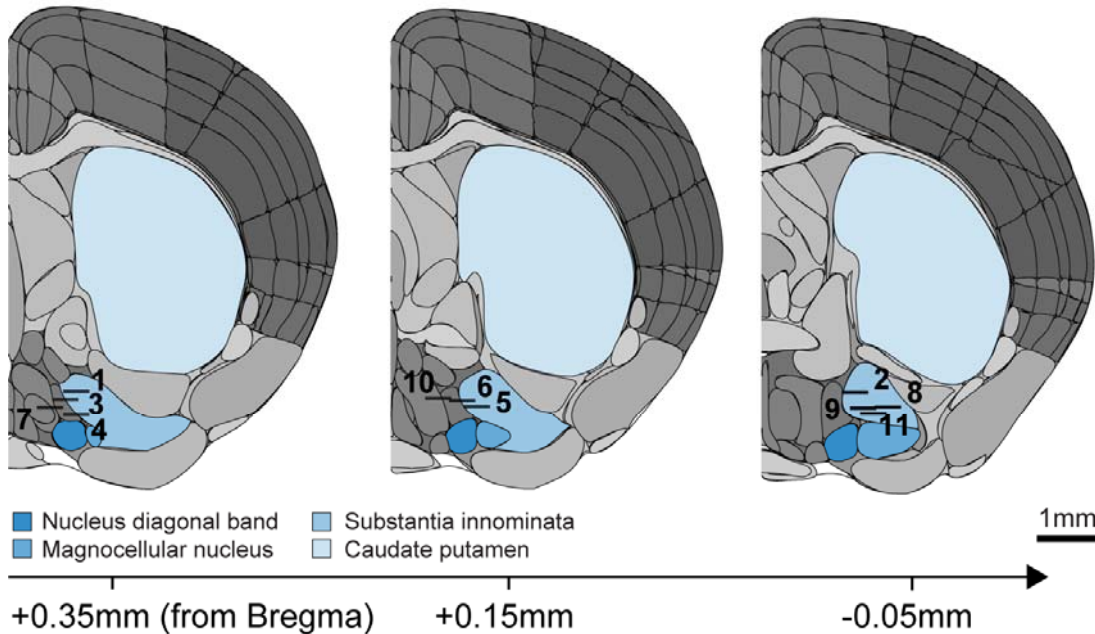

### Reconstruction of caudal fiber tip center locations from mice #1-11

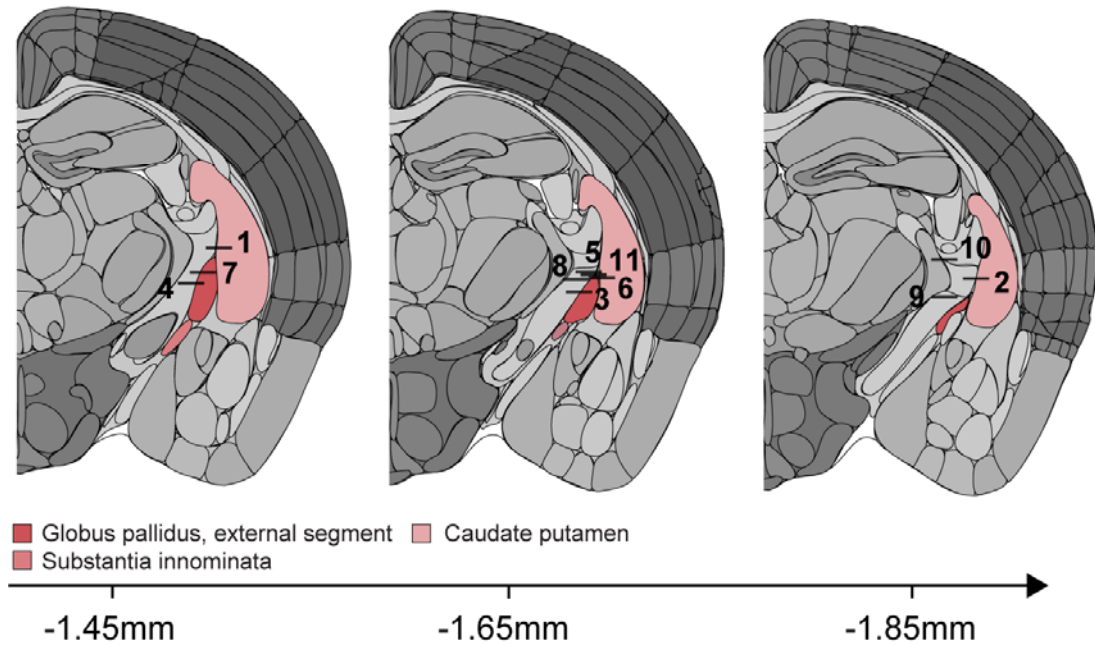

1116

1117

### Figure 1 – figure supplement 1. Anatomical locations of HDB and GP/SI fiber tips.

1118

The center of each 0.4mm fiber implanted in rostral (top) and caudal (bottom) locations of the basal forebrain were identified in post-mortem sections of the 11 mice used throughout our study. Coronal diagrams are adapted from the 2011 adult mouse coronal reference atlas created by the Allen Institute for Brain Science. Approximate distance from Bregma was identified from corresponding sections from the 2008 P56 mouse coronal atlas also created by the Allen Institute for Brain Science (Lein et al., 2007).

1124

1125 **Figure 1 – source data 1.** Counts of GCaMP-expressing and ChAT-expressing cells in HDB,  
1126 GP/Sl, and the rostral and caudal caudate putamen.

1127

1128

1129

1130

1131

1132

1133

1134

1135

1136

1137

1138

1139

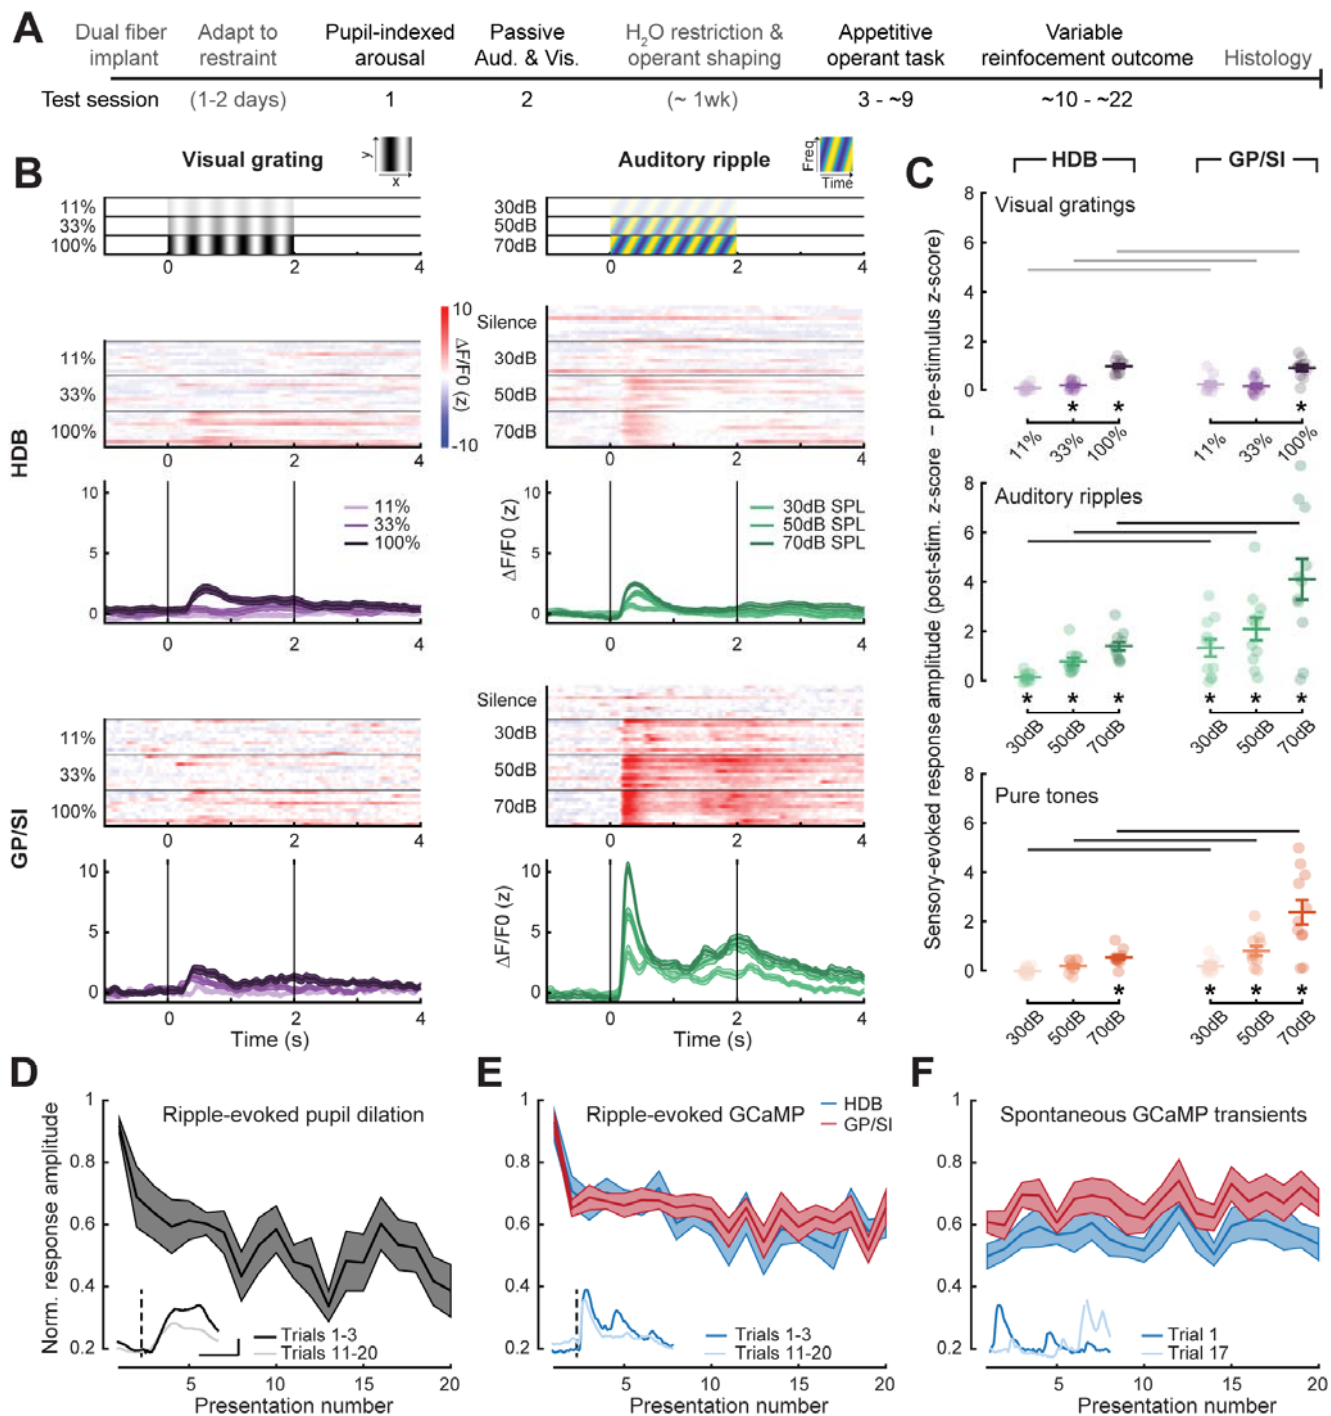

1140

1141

1142

**Figure 2. Strong, rapidly habituating responses to unconditioned auditory - but not visual - stimuli in GP/Sl cholinergic neurons.**

1143

1144

1145

(A) Timeline for measurement sessions (black text) and procedures (gray text) performed in each of 11 ChAT-Cre- $\Delta$ neo  $\times$  Ai148 mice. BFCN responses to unconditioned auditory and visual stimuli described below were measured during test session 2.

1146

1147

1148

(B) BFCN responses to drifting visual gratings of varying contrast (left) and auditory spectrotemporal ripples of varying sound levels (right) are shown for an example mouse. Heat maps depict fractional change values for individual trials in HDB (top row) and GP/Sl (bottom



1149 row). Line plots depict mean  $\pm$  SEM z-scored fractional change across all trials. Vertical bars  
1150 denote onset and offset of the 2s stimulus period.

1151 **(C)** Evoked response amplitudes to auditory and visual stimuli in HDB (*left column*) and GP/SI  
1152 (*right column*). Circles denote individual mice (N=11 for all conditions), bars denote sample  
1153 mean and SEM sensory response amplitudes. Responses at variable stimulus intensities are  
1154 averaged across horizontal/vertical visual orientations (*top*), upward and downward auditory  
1155 frequency modulation (*middle*), and low, middle, and high auditory pure tone frequencies  
1156 (*bottom*). Refer to **Figure 2 – figure supplement 1** for a comparison of responses to each  
1157 direction of visual and auditory stimulus change. Sensory-evoked cholinergic responses to  
1158 visual gratings and auditory ripples increase with intensity and contrast, but are stronger  
1159 overall in GP/SI, particularly in the auditory modality (3-way repeated measures ANOVA with  
1160 structure, stimulus level, and modality as independent variables: Main effect for structure,  $F =$   
1161  $10.09$ ,  $p = 0.01$ ; Main effect for stimulus level,  $F = 63.52$ ,  $p = 2 \times 10^{-9}$ ; Main effect for modality,  
1162  $F = 20.83$ ,  $p = 0.001$ ; Modality  $\times$  structure  $\times$  level interaction term,  $F = 9.1$ ,  $p = 0.002$ ).  
1163 Asterisks denote a significant difference in the peak post- and pre-stimulus response (paired t-  
1164 test,  $p < 0.05$ , corrected for multiple comparisons). Black and gray horizontal bars denote  
1165 significant and non-significant differences, respectively, in sensory-evoked response  
1166 amplitudes between HDB and GP/SI (paired t-test,  $p < 0.05$ , corrected for multiple  
1167 comparisons).

1168 **(D)** Mean  $\pm$  SEM normalized pupil dilations evoked by 70 dB SPL auditory ripples significantly  
1169 decreased over 20 presentations (One-way repeated measures ANOVA,  $F = 2.85$ ,  $p = 0.0003$ ;  
1170  $N = 7$  mice). *Inset*: Mean sound-evoked pupil diameter change in an example mouse for trials  
1171 1-3 versus 11-20. Inset scale bar = 1 z-score and 2s and applies to all inset panels below.  
1172 Vertical dashed line = onset of the 2s stimulus.

1173 **(E)** Mean  $\pm$  SEM normalized BFCN response to auditory ripples were significantly and  
1174 equivalently reduced in HDB and GP/SI over 20 presentations (2-way repeated measures  
1175 ANOVA with structure and presentation number as independent variables: Main effect for  
1176 structure,  $F = 0.51$ ,  $p = 0.49$ ; Main effect for presentation number,  $F = 6.11$ ,  $p = 5 \times 10^{-12}$ ;  $N =$   
1177 11 mice). *Insets*: Mean response from an HDB fiber of an example mouse for trials 1-3 versus  
1178 11-20. **Figure 2 – figure supplement 2** presents habituation functions for other auditory and  
1179 visual stimulus types at varying stimulus intensities.

1180 **(F)** Mean  $\pm$  SEM normalized BFCN spontaneous GCaMP transient amplitudes did not change  
1181 over 20 measurement blocks (2-way repeated measures ANOVA with structure and  
1182 presentation number as independent variables: Main effect for structure,  $F = 0.80$ ,  $p = 0.70$ ;  
1183 Presentation number  $\times$  structure interaction term,  $F = 0.57$ ,  $p = 0.93$ ;  $N = 11$  mice). *Insets*:  
1184 Spontaneous transients from an HDB fiber in two trials for which no stimulus was presented.

1185

1186

1187

1188

1189

1190

1191

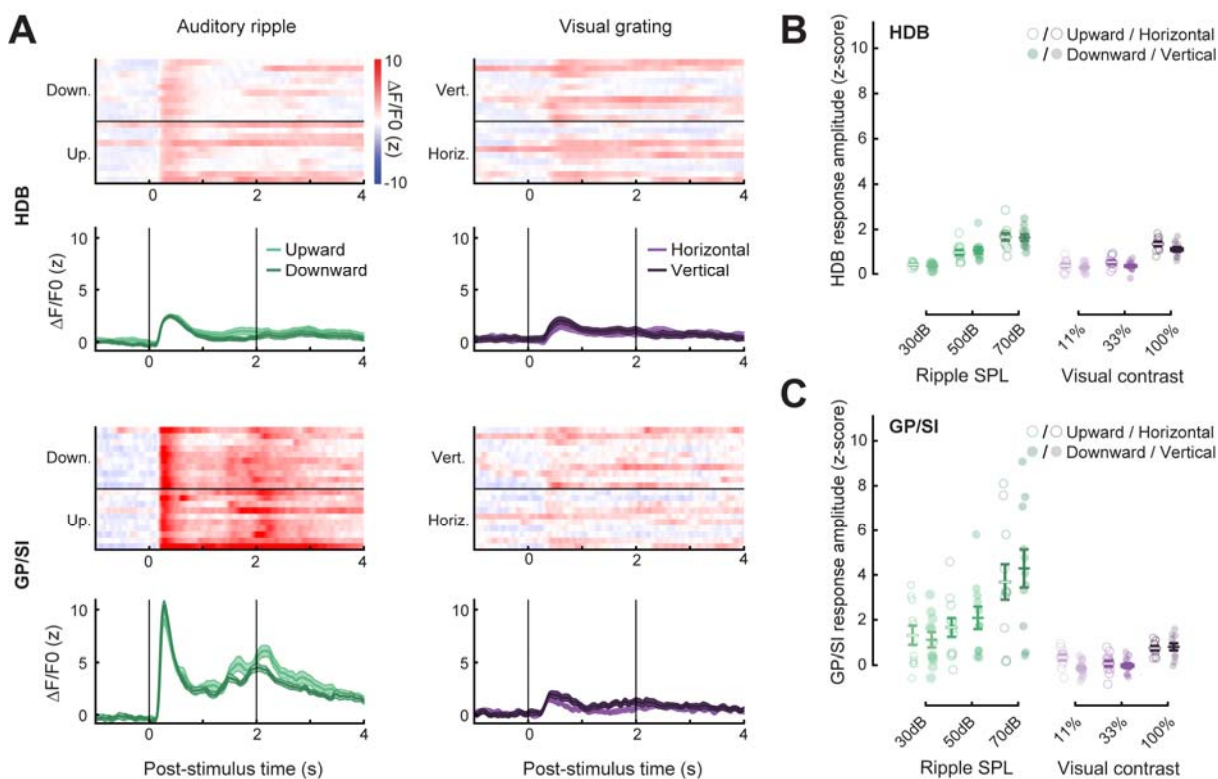

1192

1193

1194

1195

**Figure 2 – figure supplement 1. Equivalent BFCN responses to varying directions of auditory and visual drifting gratings.**

1196

1197

1198

1199

1200

(A) BFCN responses to auditory spectrotemporal ripples (*left column*) and visual gratings (*right column*) of varying direction are shown for an example mouse. Heat maps depict fractional change values for individual trials in HDB (top row) and GP/SI (bottom row). Line plots depict mean  $\pm$  SEM z-scored fractional change across all trials. Vertical bars denote onset and offset of the 2s stimulus period.

1201

1202

1203

1204

1205

1206

1207

(B-C) Evoked response amplitudes to auditory and visual stimuli in HDB (B) and GP/SI (C). Circles denote individual mice (N=11 for all conditions), bars denote sample mean and SEM sensory response amplitudes. Responses at variable stimulus intensities are plotted for each direction of spatial and spectral change, but no differences in response amplitude were identified for visual or auditory direction (3-way repeated measures ANOVAs with structure, stimulus level, and direction as independent variables: Main effect for visual grating direction,  $F = 1.37$ ,  $p = 0.26$ ; main effect for ripple direction,  $F = 0.37$ ,  $p = 0.55$ ).

1208

1209

1210

1211

1212

1213

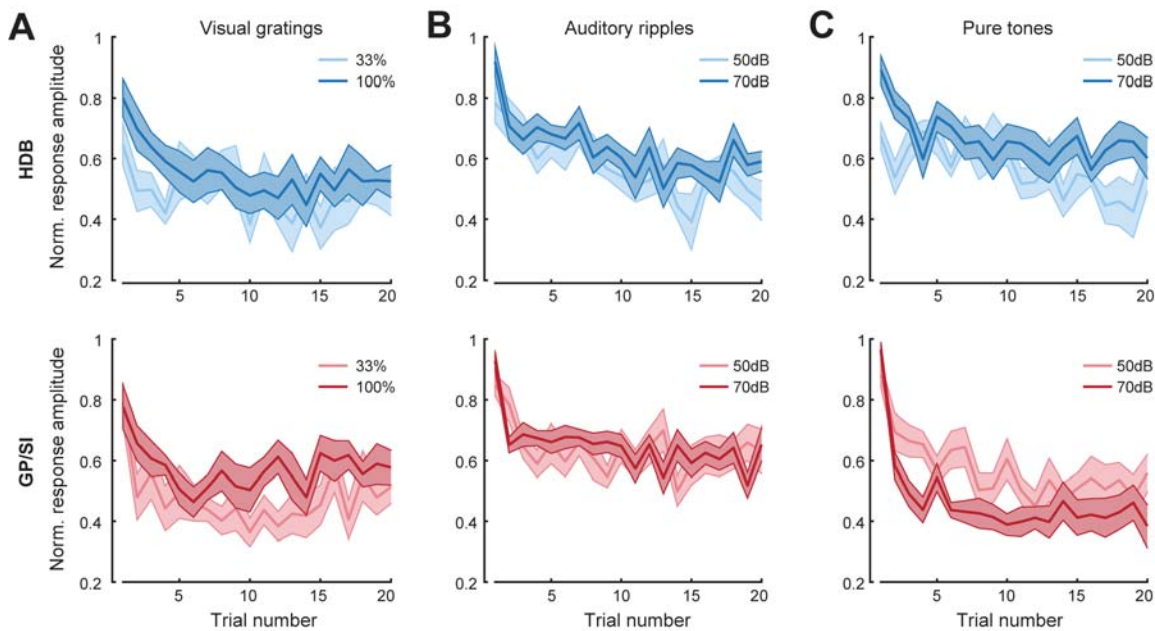

1214

1215

1216

**Figure 2 – figure supplement 2. BFCN responses to unconditioned sensory cues rapidly habituate across stimulus type, modality, and intensity.**

1217

(A) Mean  $\pm$  SEM normalized BFCN response to visual drifting gratings were significantly and equivalently reduced in HDB (*top*) and GP/SI (*bottom*) over 20 presentations. Three-way repeated measures ANOVA with structure, trial number, and intensity as independent variables: Main effect for structure,  $F = 0.006$ ,  $p = 0.94$ ; Main effect for trial number,  $F = 2.76$ ,  $p = 0.0002$ ; Main effect for intensity,  $F = 47.69$ ,  $p = 0.00004$ ; Trial  $\times$  level interaction term,  $F = 0.6$ ,  $p = 0.9$ ;  $N = 11$  mice.

1223

(B) Mean  $\pm$  SEM normalized BFCN response to auditory ripples were significantly and equivalently reduced in HDB (*top*) and GP/SI (*bottom*) over 20 presentations. Three-way repeated measures ANOVA with structure, trial number, and intensity as independent variables: Main effect for structure,  $F = 2.77$ ,  $p = 0.13$ ; Main effect for trial number,  $F = 5.95$ ,  $p = 2 \times 10^{-11}$ ; Main effect for intensity,  $F = 2.16$ ,  $p = 0.17$ ; Trial  $\times$  level interaction term,  $F = 1.43$ ,  $p = 0.12$ ;  $N = 11$  mice.

1229

(C) Mean  $\pm$  SEM normalized BFCN response to pure tones were significantly reduced in HDB (*top*) and GP/SI (*bottom*) over 20 presentations. Three-way repeated measures ANOVA with structure, trial number, and intensity as independent variables: Main effect for structure,  $F = 4.64$ ,  $p = 0.06$ ; Main effect for trial number,  $F = 9.26$ ,  $p = 2 \times 10^{-18}$ ; Main effect for intensity,  $F = 0.08$ ,  $p = 0.78$ ; structure  $\times$  intensity interaction term,  $F = 15.09$ ,  $p = 0.003$ ;  $N = 11$  mice.

1234

1235

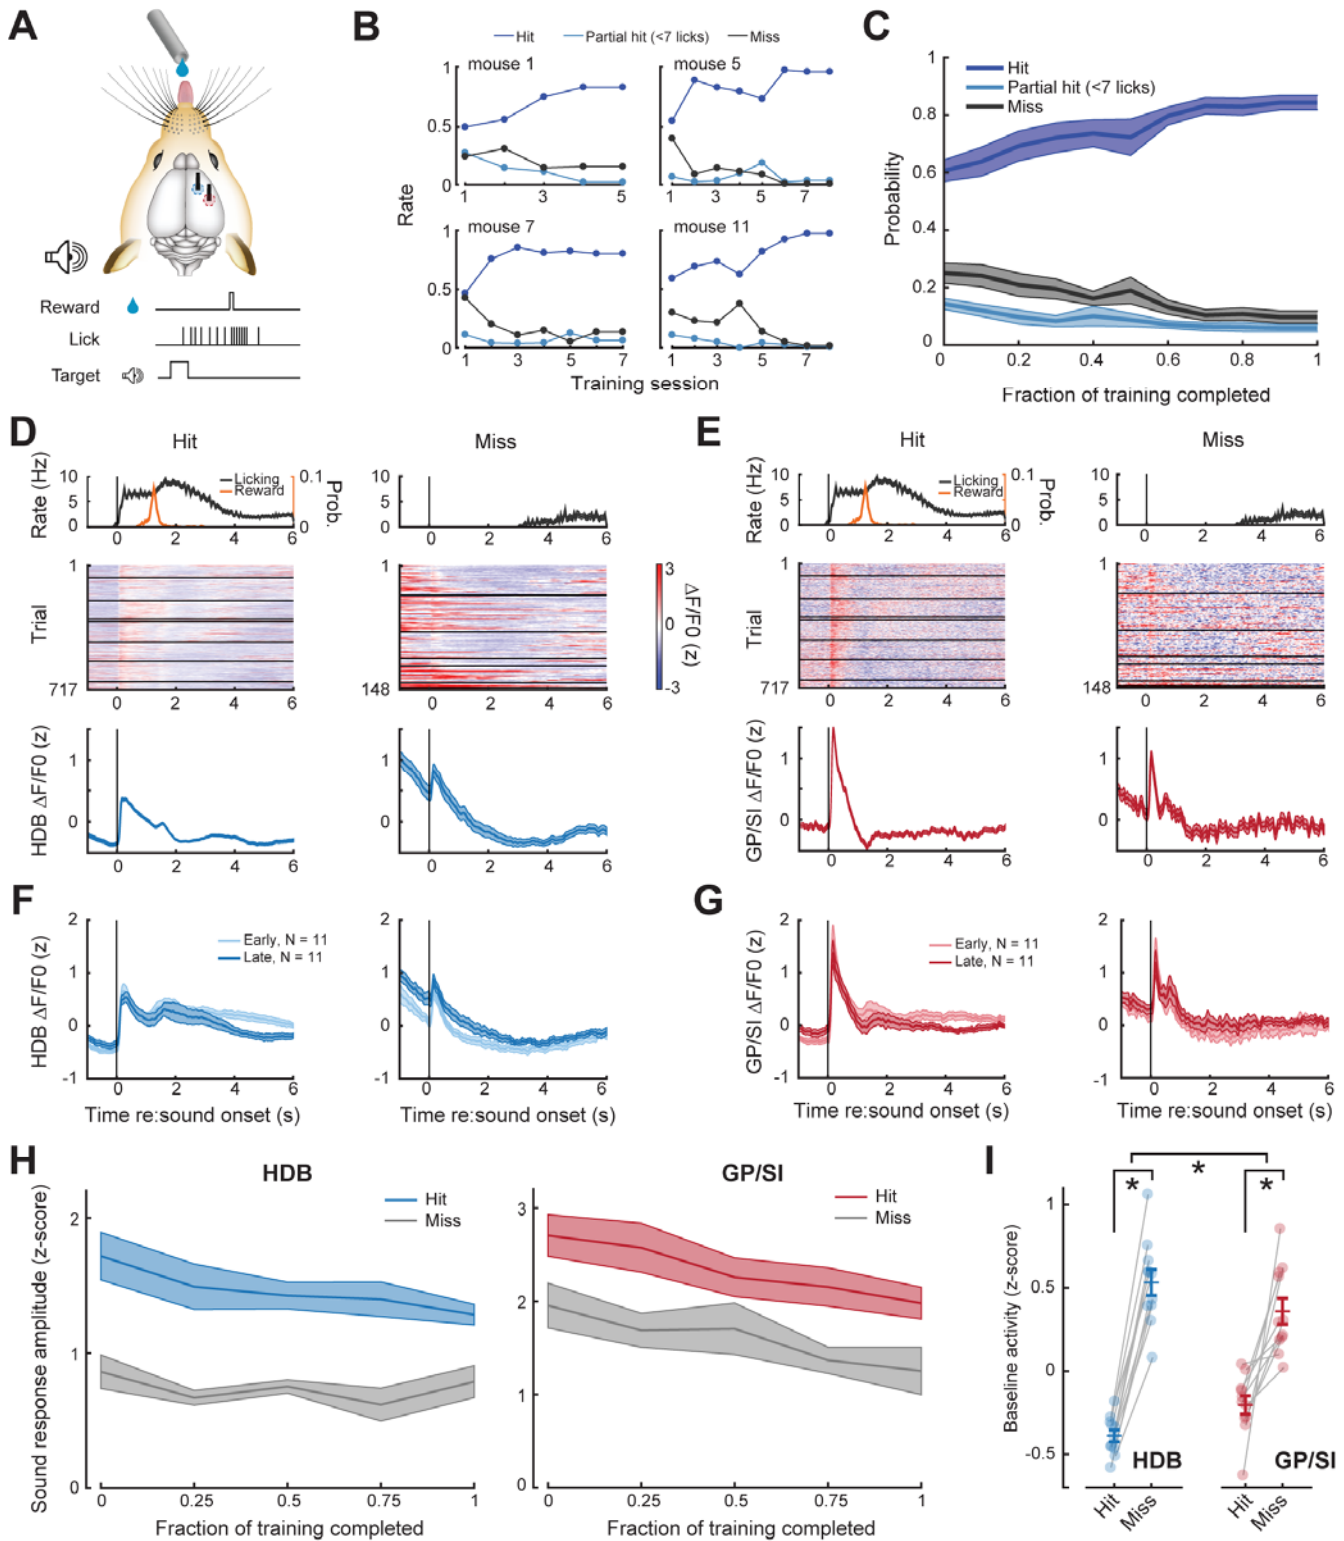

**Figure 3. Pre-stimulus cholinergic basal forebrain activity distinguishes behavioral hit and miss trials during an auditory detection task.**

(A) Mice were rewarded for producing a vigorous bout of licking (at least 7 licks in 2.8s) shortly after a low-, mid-, or high-frequency tone.

1236  
1237

1238  
1239

1240  
1241

1242 **(B)** Learning curves from four example mice that became competent in the detection task at  
1243 slightly different rates.

1244 **(C)** Mean  $\pm$  SEM probability of hit, partial hit, and miss trial outcome as fraction of training  
1245 completed in  $N = 11$  mice.

1246 **(D-E)** Tone-evoked cholinergic GCaMP responses from the HDB (*D*) and GP/SI (*E*) of a single  
1247 mouse from 717 hit and 148 miss trials distributed over eight appetitive conditioning sessions.  
1248 Left columns present the timing of lickspout activity, reward probability, heatmaps single trial  
1249 fractional change values, and mean  $\pm$  SEM fractional change values. Right columns present  
1250 the same data on miss trials. Horizontal black lines in heatmaps denote different daily  
1251 recording sessions. Vertical lines denote tone onset.

1252 **(F-G)** Plotting conventions match *D-E*, except that data are averaged across all mice ( $N=11$ )  
1253 and the first third of training trials (early) are plotted separately from the last third of training  
1254 trials (late). Training-related changes in the sensory-evoked responses were not observed,  
1255 though see Figure 3 – figure supplement 1 for an analysis of small differences in the sustained  
1256 response.

1257 **(H)** Mean  $\pm$  SEM sound-evoked response amplitudes in all 11 mice were calculated by  
1258 subtracting the mean activity during a 2s pre-stimulus baseline period from the peak of activity  
1259 within 400ms of sound onset. Each behavior session was assigned to one of five different  
1260 discrete time bins according to the fraction of total training completed. Although sound-evoked  
1261 responses are reduced on miss trials compared to hit trials, they remain relatively stable  
1262 across all conditions as mice learn to associate neutral sounds with reward (3-way repeated  
1263 measures ANOVA with training time, trial type, and structure as independent variables: main  
1264 effect for training time,  $F = 2.46$ ,  $p = 0.08$ ; main effect for trial type,  $F = 14.74$ ,  $p = 0.012$ ;  
1265 training time  $\times$  trial type  $\times$  structure interaction,  $F = 0.56$ ,  $p = 0.7$ ).

1266 **(I)** Mean baseline activity during a 1s period preceding stimulus onset on hit and miss trials.  
1267 Circles denote individual mice ( $N=11$  for all conditions), bars denote sample mean and SEM.  
1268 Pre-stimulus baseline activity was significantly higher on miss trials than hit trials, particularly in  
1269 HDB (2-way repeated measures ANOVA with trial type and structure as independent variables:  
1270 main effect for trial type,  $F = 102.04$ ,  $p = 1 \times 10^{-6}$ ; trial type  $\times$  structure interaction,  $F = 7.89$ ,  $p =$   
1271  $0.02$ ). Asterisks denote significant differences based on within-structure post-hoc pairwise  
1272 contrasts ( $p < 0.001$  for both) or the trial type  $\times$  structure interaction term ( $p = 0.2$ ).

1273

1274

1275

1276

1277

1278

1279

1280

1281

1282

1283

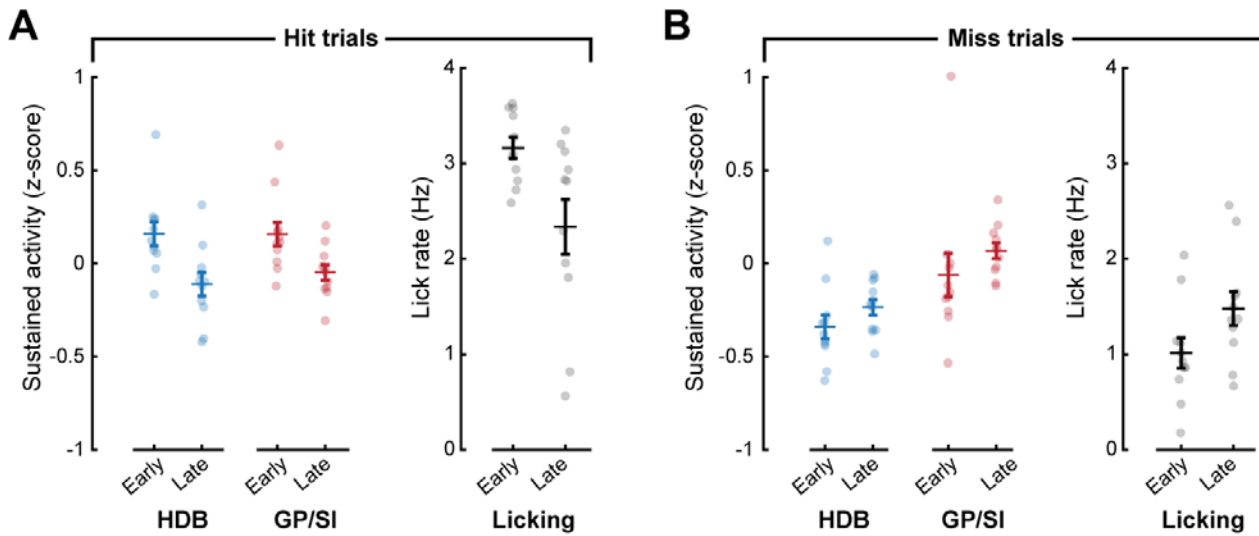

1284

1285

1286 **Figure 3 – figure supplement 1. Lick rates may account for subtle differences in**  
1287 **sustained BFCN sustained activity across learning.**

1288 (A) On hit trials, sustained BFCN activity (3-6s following the onset of the auditory cue) is  
1289 greater in early training than later in the training period, but so is the lick rate measured during  
1290 the same time period.

1291 (B) On miss trials, sustained BFCN activity (3-6s following the onset of the auditory cue) is  
1292 greater in early training than later in the training period, but so is the lick rate measured during  
1293 the same time period.

1294

1295

1296

1297

1298

1299

1300

1301

1302

1303

1304

1305

1306

1307

1308

1309

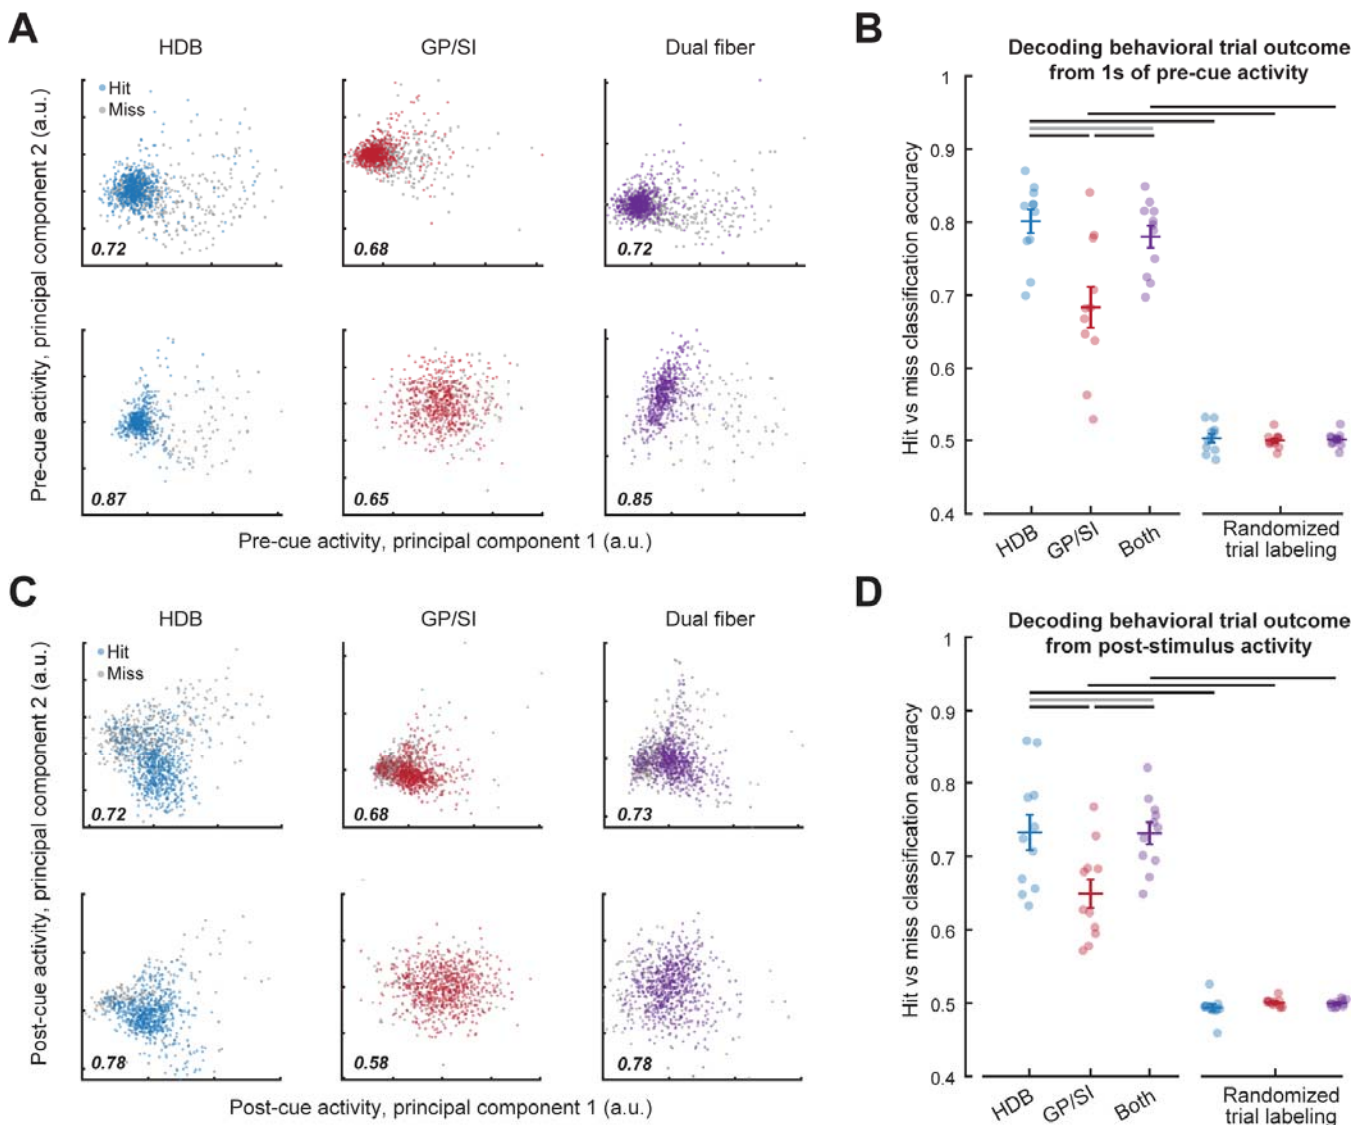

**Figure 4. Pre- and post-cue BFCN activity predicts behavioral accuracy.**

(A) Bulk BFCN activity measured 1s prior to tone onset for two representative mice. Circles denote activity from individual hit and miss trials projected onto the first two principal components. A support vector machine was used to assign principal component projections for individual trials to hit and miss outcomes. Classification accuracy is provided as the fraction of correctly assigned individual trials for HDB, GP/SI, and the simultaneous activity measured from both fibers (blue, red, and purple, respectively).

(B) Accuracy for support vector machine classification of behavioral trial outcome based on 1s of activity immediately preceding cue onset. Circles denote mean accuracy for the HDB, GP/SI, or both fibers in each individual mouse. Bars denote Mean  $\pm$  SEM. Baseline HDB activity more accurately decodes forthcoming trial outcome than GP/SI and is no worse than both fibers combined, though all conditions are significantly above chance (2-way repeated measures ANOVA with randomization and structure as independent variables: main effect for randomization,  $F = 339.37$ ,  $p = 5 \times 10^{-9}$ ; main effect for structure,  $F = 11.64$ ,  $p = 0.0004$ ). Black and gray horizontal lines indicate significant ( $p < 0.01$  for all) and non-significant ( $p = 0.05$ ) pairwise contrasts, respectively, after correcting for multiple comparisons.

1328 **(C)** Plotting conventions match *A*, except that data come from the 400ms period immediately  
1329 following cue onset.

1330 **(D)** Plotting conventions match *B*, except that data come from the 400ms period immediately  
1331 following cue onset. Post-cue HDB activity is less accurate at decoding forthcoming trial  
1332 accuracy overall than baseline activity, though accuracy is still greater than chance and still  
1333 relatively better in HDB than GP/SI (3-way repeated measures ANOVA with activity period,  
1334 randomization, and structure as independent variables: main effect for activity period,  $F =$   
1335  $10.57$ ,  $p = 0.009$ ; main effect for randomization,  $F = 339.37$ ,  $p = 5 \times 10^{-9}$ ; main effect for  
1336 structure,  $F = 11.6$ ,  $p = 4 \times 10^{-4}$ ). Black and gray horizontal lines indicate significant ( $p < 0.04$   
1337 for all) and non-significant ( $p = 0.96$ ) pairwise contrasts, respectively, after correcting for  
1338 multiple comparisons.

1339

1340

1341



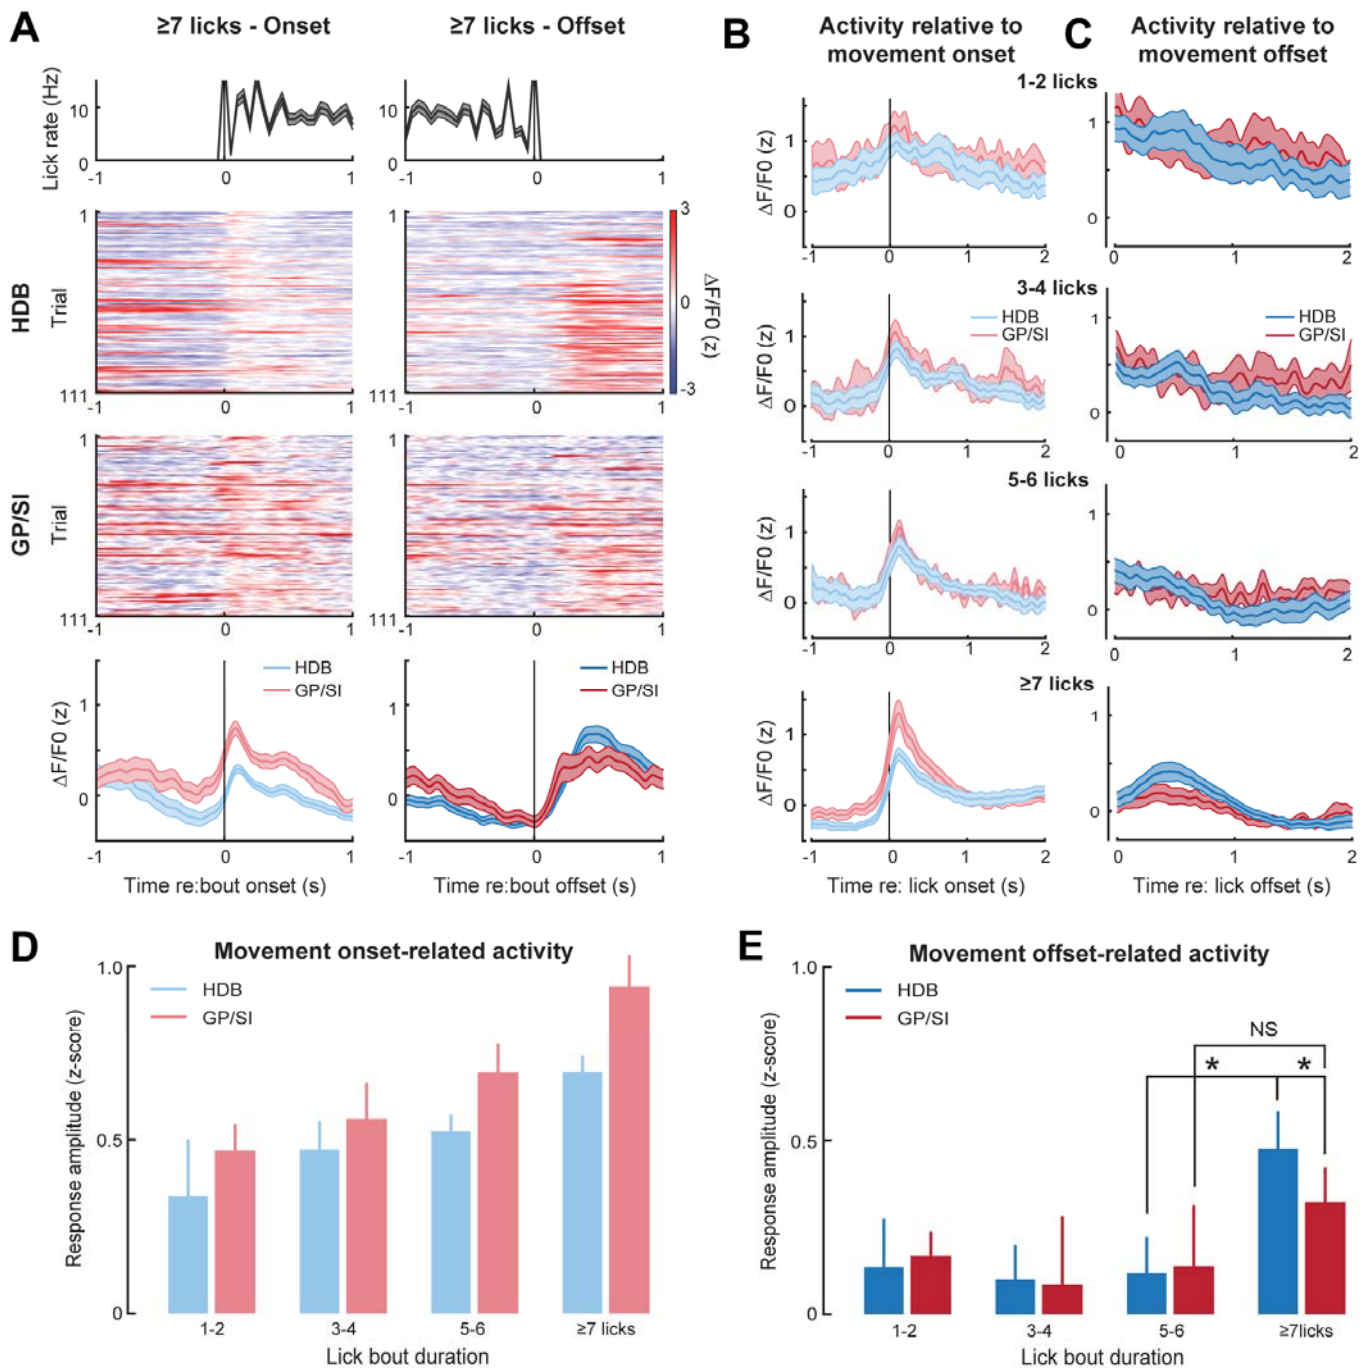

1342

1343

1344

### Figure 5. Motor-related activation of the cholinergic basal forebrain

1345 (A) HDB and GP/SI activity from an example mouse related to the onset (left column) and  
 1346 offset (right column) of vigorous lick bouts during the inter-trial period of the appetitive operant  
 1347 task. Line plots in top and bottom row reflect mean  $\pm$  SEM.

1348 (B-C) Inter-trial lick bouts were binned according to whether they contained 1-2, 3-4, 5-6, or  
 1349 the full 7+ licks that would have triggered reward delivery if produced at the appropriate time  
 1350 during the operant task. Mean  $\pm$  SEM activity from N=11 mice related to the onset (B) or offset  
 1351 (C) of different lick bout durations.

1352 **(D)** Response amplitudes related to lick bout onset were calculated by subtracting the  
1353 maximum activity from the 250ms period preceding bout onset from the maximum activity  
1354 occurring within 700ms following lickspout contact. Movement-related responses increased  
1355 with lick bout duration and were greater overall in GP/SI than HDB (2-way repeated measures  
1356 ANOVA with bout duration and structure as independent variables: main effect for bout  
1357 duration,  $F = 6.92$ ,  $p = 0.001$ ; main effect for structure,  $F = 6.33$ ,  $p = 0.03$ ).

1358 **(E)** Response amplitudes related to lick bout offset were calculated by subtracting the  
1359 maximum activity from the 400ms period preceding lick bout offset from the maximum activity  
1360 occurring within 700ms following lick spout offset. Overall, the offset of licking did not elicit a  
1361 response (2-way repeated measures ANOVA with bout duration and structure as independent  
1362 variables: main effect for bout duration,  $F = 1.47$   $p = 0.24$ ). In HDB, a response was observed  
1363 at the offset of licking, but only for intense bouts of  $\geq 7$  licks (pairwise post-hoc contrast: 7+ vs  
1364 5-6,  $p = 0.01$ ). No comparable response was observed in GP/SI (pairwise post-hoc contrast:  
1365 7+ vs 5-6,  $p = 1$ ; 7+ GP/SI vs HDB,  $p = 0.03$ ). Asterisks denote pairwise contrast  $p$  values  $<$   
1366  $0.05$  after correcting for multiple comparisons. NS = not significant.

1367

1368

1369

1370

1371

1372

1373

1374

1375

1376

1377

1378

1379

1380

1381

1382

1383

1384

1385

1386

1387

1388

1389

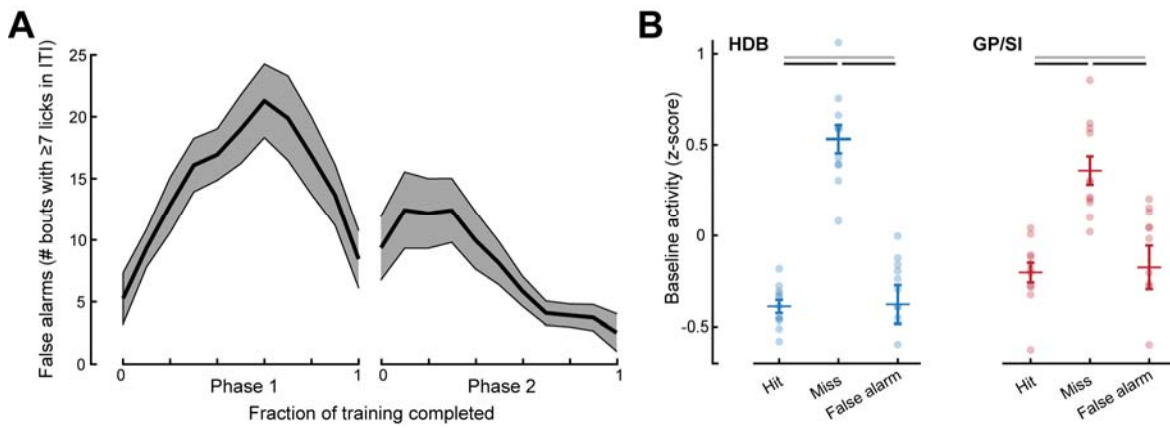

1390

1391

1392

**Figure 5 – figure supplement 1. False alarms were relatively uncommon and were not associated with elevated baseline BFCN activity.**

1393

1394

1395

(A) Mean  $\pm$  SEM incidence of false alarm events during the inter-trial interval (ITI) period measured during Phase 1 (all frequencies rewarded) and Phase 2 (variable reinforcement outcome) of the operant learning task (N = 11).

1396

1397

1398

1399

1400

(B) Mean HDB and GP/SI activity measured during a 1s period immediately preceding false alarm events are compared with the pre-cue activity preceding hit and miss trials. Hit and miss data are replotted from Figure 3I. Black lines reflect statistically significant differences after correcting for multiple comparisons ( $p < 0.03$  for each). Gray lines denote non-significant differences for HDB ( $p = 0.91$ ) and GP/SI ( $p = 0.79$ ).

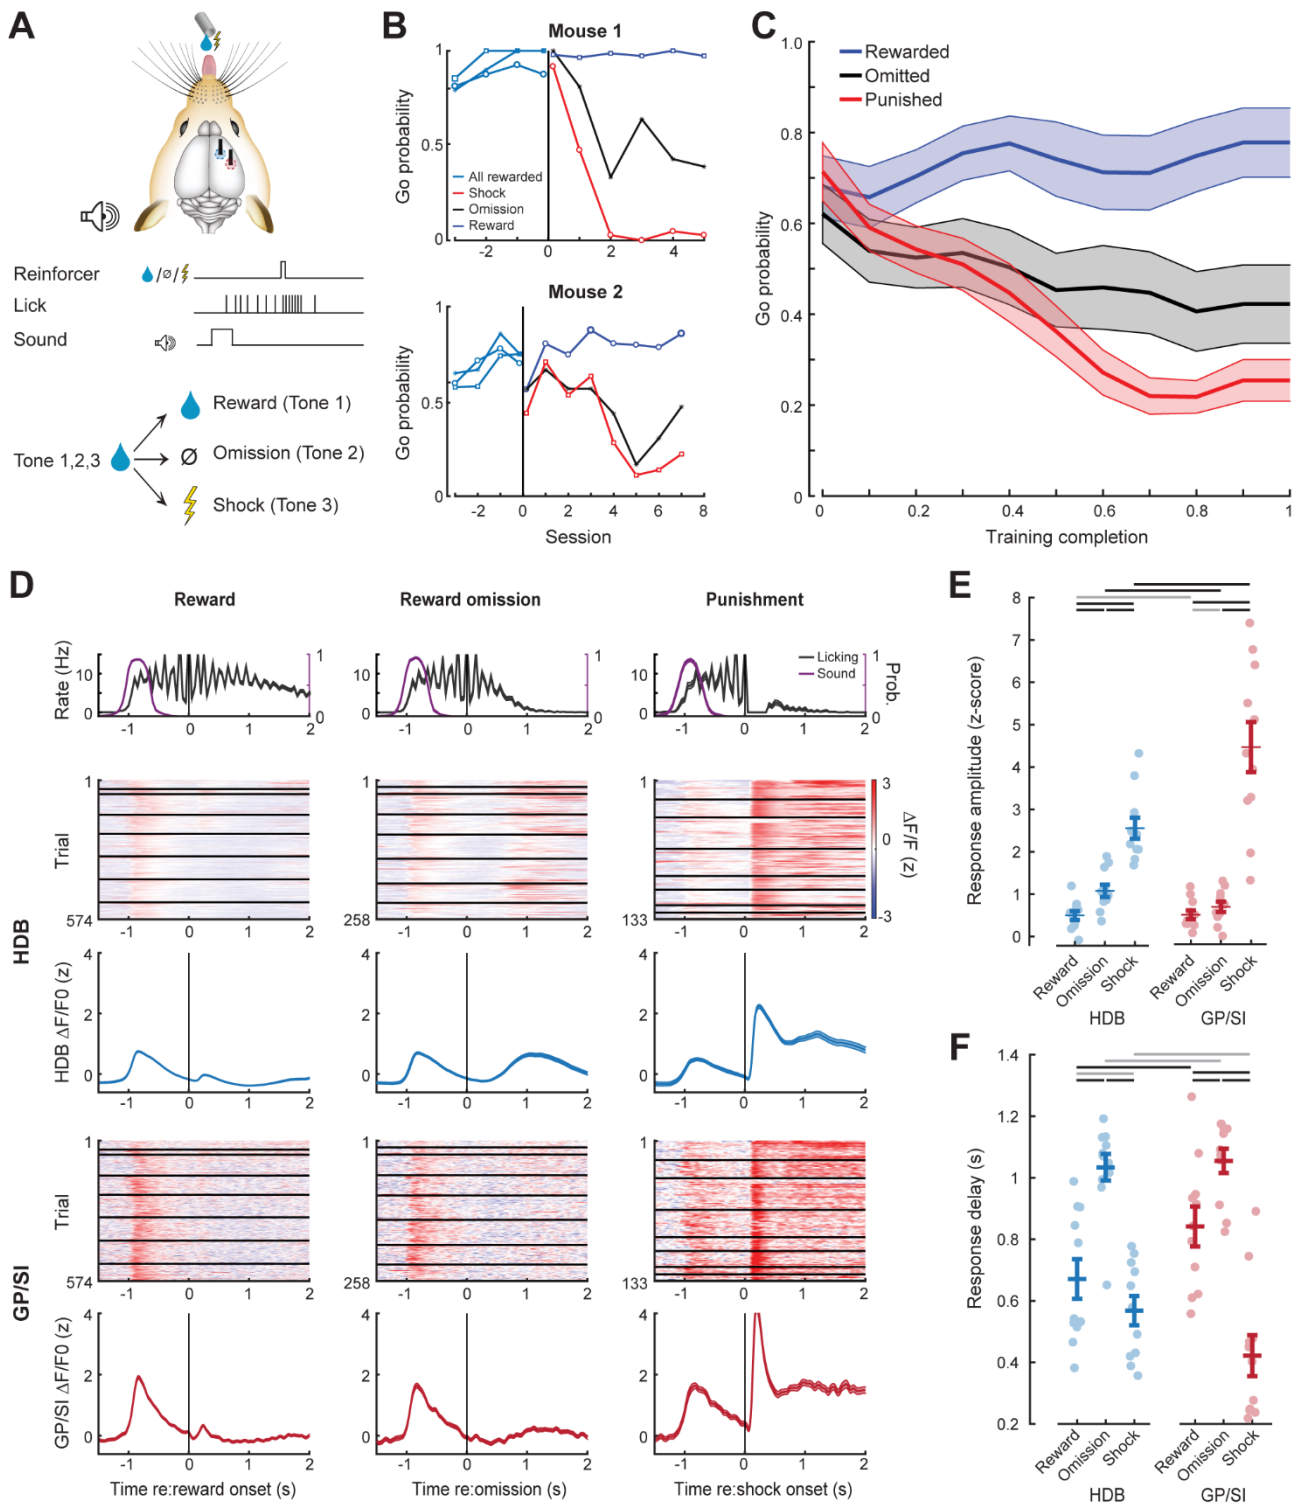

**Figure 6. Differential responses of HDB and GP/SI BFCNs to reward, punishment, and reward omission.**

(A) Once mice were reliably licking for reward following the onset of the low- mid- or high-frequency tone, the reinforcement outcome was changed such that  $\geq 7$  licks in 2.8s elicited a tongue shock for one frequency and the omission of reward for the other.

1408 **(B)** Go ( $\geq 7$  licks in 2.8s) probability for all three tones when they were all associated with  
1409 reward and after the reinforcement outcome was changed for two of the tones. Data are shown  
1410 for two mice that modify their behavior to the change in reinforcement outcome at different  
1411 rates. Vertical line denotes the transition from all rewarded (Phase 1) to variable outcome  
1412 (Phase 2). Circle, asterisk, and squares indicate low-, mid-, and high-frequency tones,  
1413 respectively.

1414 **(C)** Mean  $\pm$  SEM Go probability for each reinforcement outcome as fraction of training  
1415 completed in N = 11 mice.

1416 **(D)** Tone-evoked cholinergic GCaMP responses from HDB (rows 2-3) and GP/Sl (rows 4-5) of  
1417 a single mouse from 965 Go trials distributed over eight behavioral sessions following the  
1418 change in reinforcement outcome. All data are plotted relative to reinforcement onset. *Top row:*  
1419 Timing of lickspout activity (black) and tone onset probability (purple). *Rows 2 and 4:* heatmaps  
1420 of single trial fractional change values in HDB (row 2) and GP/Sl (row 4). Horizontal black lines  
1421 in heatmaps denote different daily recording sessions. *Rows 3 and 5:* Mean  $\pm$  SEM  
1422 corresponding to each of the heatmaps above. Vertical lines denote reinforcement onset.

1423 **(E)** Reinforcement-related response amplitudes were calculated by subtracting the mean  
1424 activity during a 2s pre-stimulus baseline period from the peak activity occurring within 2s  
1425 following the 7<sup>th</sup> lick. Circles denote individual mice (N=11 for all conditions), bars denote  
1426 sample mean and SEM. Two-way repeated measures ANOVA with reinforcement type and  
1427 structure as independent variables: Reinforcement type,  $F = 80.62$ ,  $p = 3 \times 10^{-10}$ ; Structure,  $F =$   
1428  $5.7$ ,  $p = 0.03$ ; Reinforcement type  $\times$  structure interaction,  $F = 8.01$ ,  $p = 0.003$ . Black and gray  
1429 horizontal lines denote significant ( $p < 0.05$ ) and non-significant pairwise contrasts after  
1430 correcting for multiple comparisons.

1431 **(F)** Reinforcement-related response latency was defined as the mean latency of the single trial  
1432 peak responses relative to the offset of the 7<sup>th</sup> lick. Circles denote individual mice (N=11 for all  
1433 conditions), bars denote sample mean and SEM. Two-way repeated measures ANOVA with  
1434 reinforcement type and structure as independent variables: Reinforcement type,  $F = 51.28$ ,  $p =$   
1435  $1 \times 10^{-8}$ ; Structure,  $F = 0.08$ ,  $p = 0.78$ ; Reinforcement type  $\times$  structure interaction,  $F = 7.52$ ,  $p =$   
1436  $0.004$ . Black and gray horizontal lines denote significant ( $p < 0.05$ ) and non-significant pairwise  
1437 contrasts after correcting for multiple comparisons.

1438

1439

1440

1441

1442

1443

1444

1445

1446

1447

1448

1449

1450

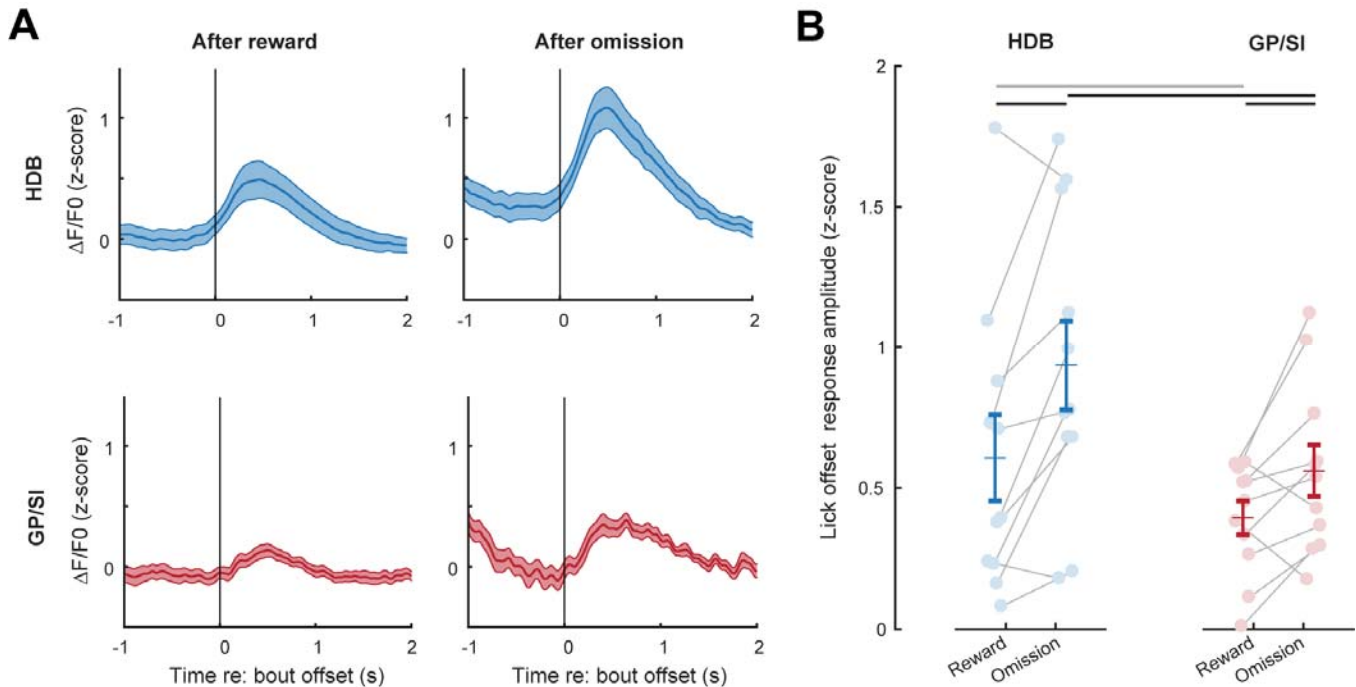

1451

1452

1453

1454

1455

1456

1457

1458

1459

1460

1461

1462

1463

1464

1465

1466

1467

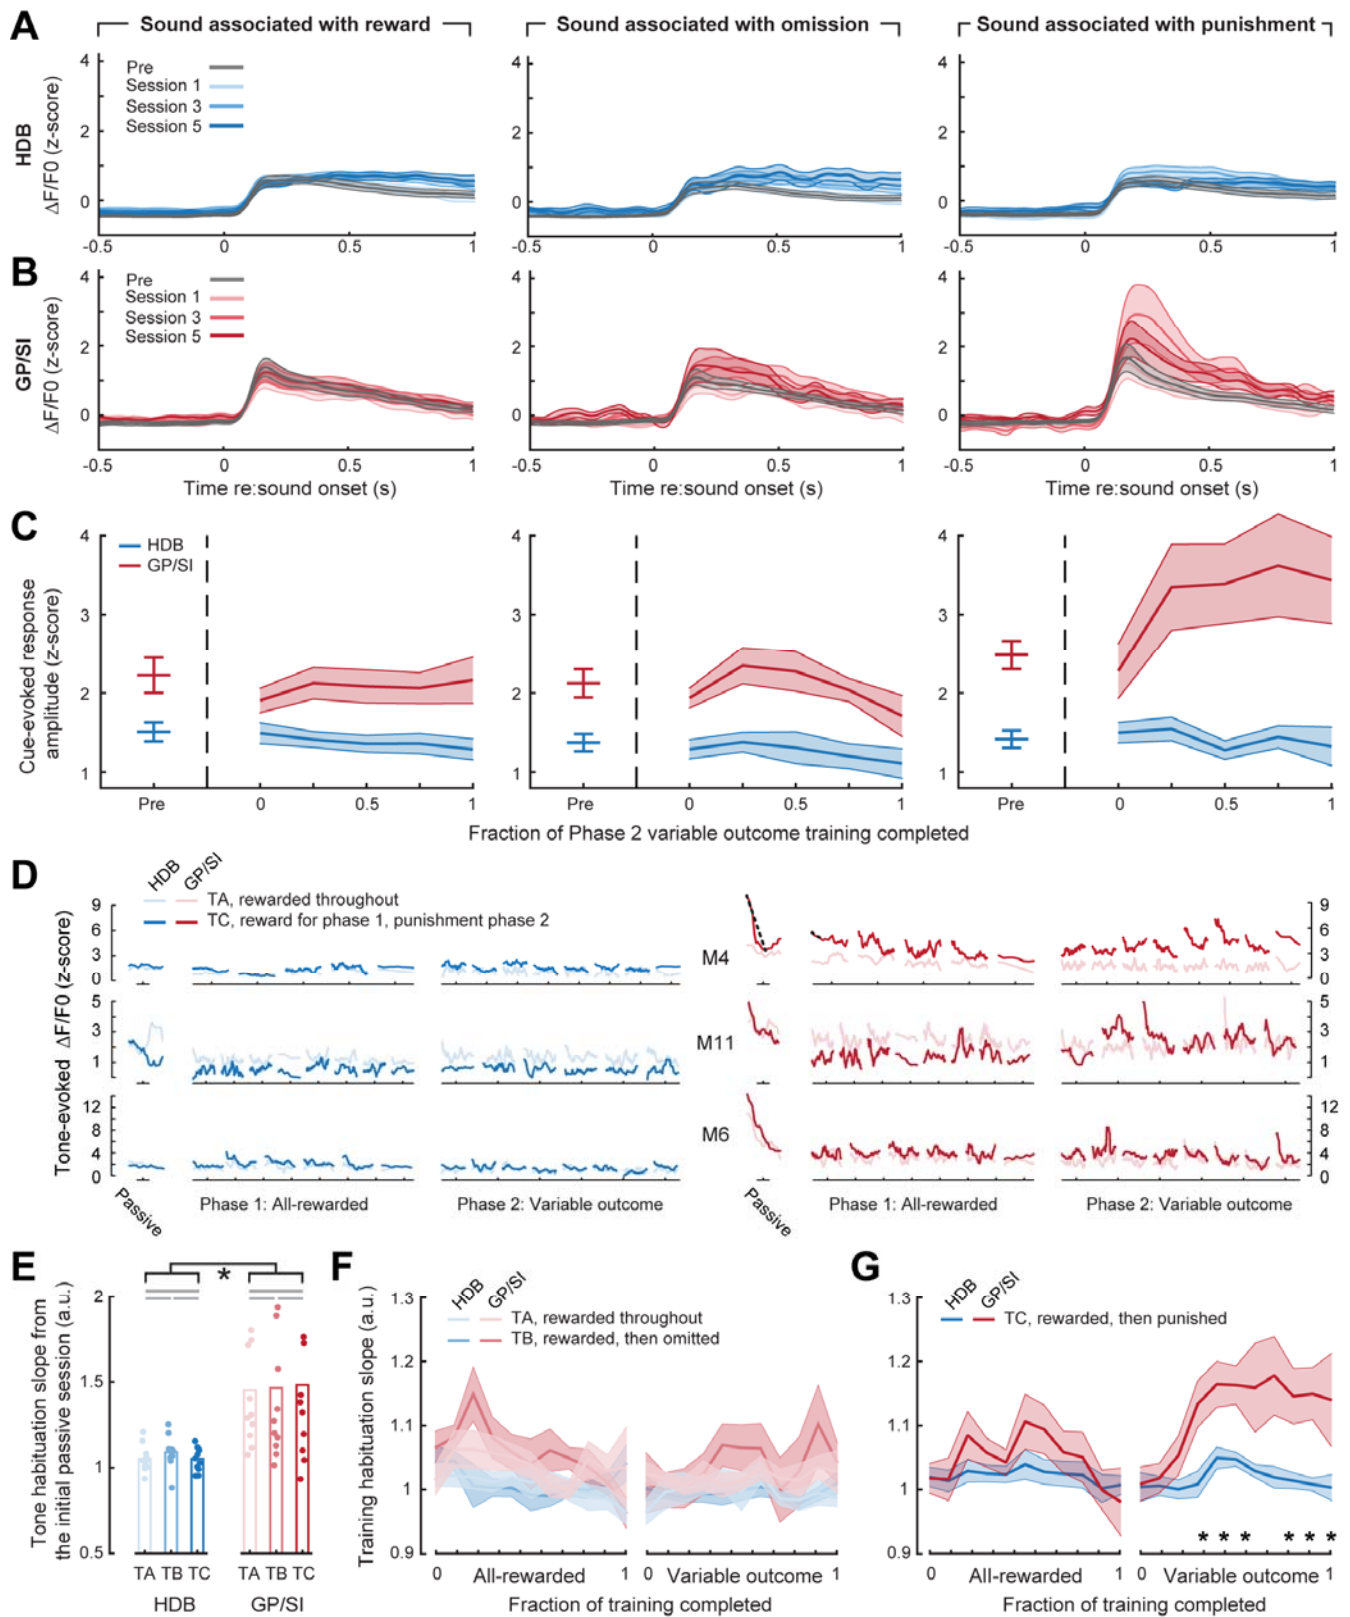

**Figure 7. Enhanced BFCN responses to punishment-predicting cues in GP/Sl, not HDB.**

(A-B) Mean  $\pm$  SEM tone-evoked GCaMP activity in HDB (N=11, A) and GP/Sl (B) for the tone frequency associated with reward (left column), reward omission (middle column), and

1468

1469

1470

1471

1472

1473 punishment (right column). Mean cue-evoked responses are shown during Phase 1 of the  
1474 task, in which all frequencies were associated with reward (gray), and for three subsequent  
1475 sessions following the transition to Phase 2, where variable reinforcement outcomes were  
1476 introduced.

1477 **(C)** Mean  $\pm$  SEM tone-evoked response amplitudes in HDB and GP/SI (N=11) were calculated  
1478 by subtracting the mean activity during a 2s pre-stimulus baseline period from the peak of  
1479 activity within 400ms of sound onset. Phase 2 behavior sessions were assigned to one of five  
1480 different discrete time bins according to the fraction of total training completed. Learning-  
1481 related enhancement was only noted for the punishment-predicting tone in GP/SI (3-way  
1482 repeated measures ANOVA with training time, reinforcement type, and structure as  
1483 independent variables: main effect for training time,  $F = 1.62$ ,  $p = 0.18$ ; main effect for  
1484 reinforcement type,  $F = 3.99$ ,  $p = 0.03$ ; main effect for structure,  $F = 23.38$ ,  $p = 0.0006$ ; training  
1485 time  $\times$  reinforcement type  $\times$  structure interaction,  $F = 2.2$ ,  $p = 0.04$ ).

1486 **(D)** Within- and between-session dynamics in tone-evoked HDB (*left*) and GP/SI (*right*)  
1487 responses are shown during the initial passive characterization session (see Figure 2) and all  
1488 subsequent Phase 1 and Phase 2 training sessions for three mice exemplifying varying  
1489 degrees of enhanced GP/SI response amplitude and habituation for punishment-predicting  
1490 sounds. Mouse (M) number corresponds to the fiber locations shown in Figure 1 – figure  
1491 supplement 1. Each individual line presents the smoothed average (7-point median filter) for all  
1492 trials within a given behavioral session for two tone frequencies. Dashed lines denote the  
1493 linear slope measurement for within-session habituation.

1494 **(E)** Within-session habituation of tone-evoked responses during the initial passive  
1495 characterization session, measured as the linear slope over the first 10 trials. Tones (T) A, B,  
1496 and C denote the frequencies that will ultimately be associated with reward, omission, and  
1497 punishment in Phase 2 of the operant task. Habituation is significantly greater in GP/SI than  
1498 HDB but does not differ between tone frequencies (2-way repeated measures ANOVA with  
1499 structure and tone frequency as independent variables: main effect for structure,  $F = 13.41$ ,  $p =$   
1500  $0.004$  [denoted by black lines and asterisk]; main effect for tone frequency,  $F = 0.08$ ,  $p = 0.92$ ).  
1501 Gray horizontal lines denote non-significant pairwise differences after correcting for multiple  
1502 comparisons ( $p > 0.58$  for each).

1503 **(F)** Within-session habituation of tone-evoked responses during Phase 1 and 2 of the operant  
1504 task, measured as the linear slope from the first 20% of trials within each session. Mean  $\pm$   
1505 SEM habituation slope for frequencies associated with reward and reward omission are not  
1506 changed over time or reinforcement type (3-way ANOVA with time, reinforcement type, and  
1507 structure as independent variables: main effect for reinforcement type,  $F = 1.0$ ,  $p = 0.34$ ; main  
1508 effect for time;  $F = 0.77$ ,  $p = 0.66$ ;  $N = 11$ ).

1509



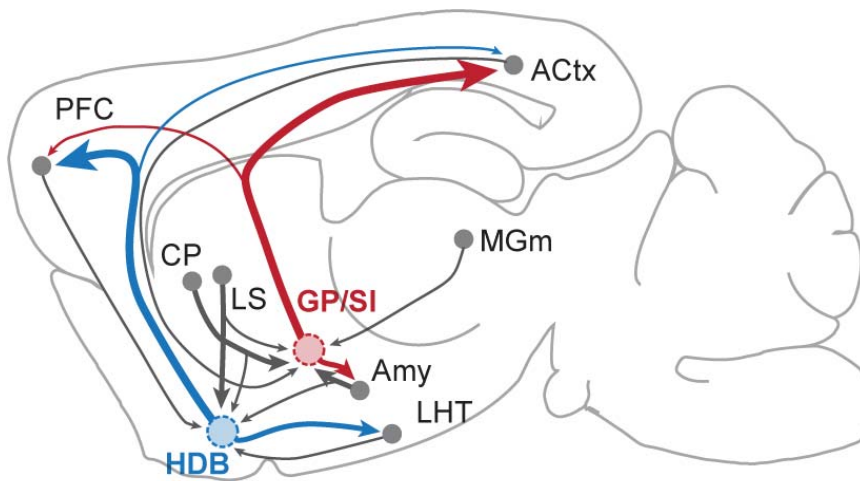

| Experimental variable                                               | Relative involvement |
|---------------------------------------------------------------------|----------------------|
| Pupil-indexed arousal (Fig. 1)                                      | HDB > GP/SI          |
| Predicting behavioral accuracy (Figs. 3,4)                          | HDB > GP/SI          |
| Reinforcement - reward omission (Fig. 6)                            | HDB > GP/SI          |
| Passive sensory - auditory (Fig. 2)                                 | GP/SI > HDB          |
| Licking / Orofacial movement (Fig. 5)                               | GP/SI > HDB          |
| Reinforcement - punishment (Fig. 6)                                 | GP/SI > HDB          |
| Learning-related plasticity for punishment-predicting cues (Fig. 7) | GP/SI > HDB          |
| Habituation to pure tone cues (Fig. 7)                              | GP/SI > HDB          |
| Habituation to broadband sounds and visual gratings (Fig. 2)        | Equivalently strong  |
| Passive sensory - visual (Fig. 2)                                   | Equivalently weak    |
| Reinforcement - reward (Fig. 6)                                     | Equivalently weak    |
| Learning-related plasticity for reward-predicting cues (Fig. 3)     | Equivalently weak    |

1510  
1511

1512 **Figure 8. Summary of functional specializations in the rostral and caudal basal**  
1513 **forebrain.** A summary of the relative involvement of HDB and GP/SI across all experimental  
1514 variables tested in this study.

1515  
1516
